# Supplementary material
Source: ML conference proceedings conference paper supplement (https://openreview.net/forum?id=k1C0auXEJHD)

subject 12

## Robust vs Standard

Proportion Correct

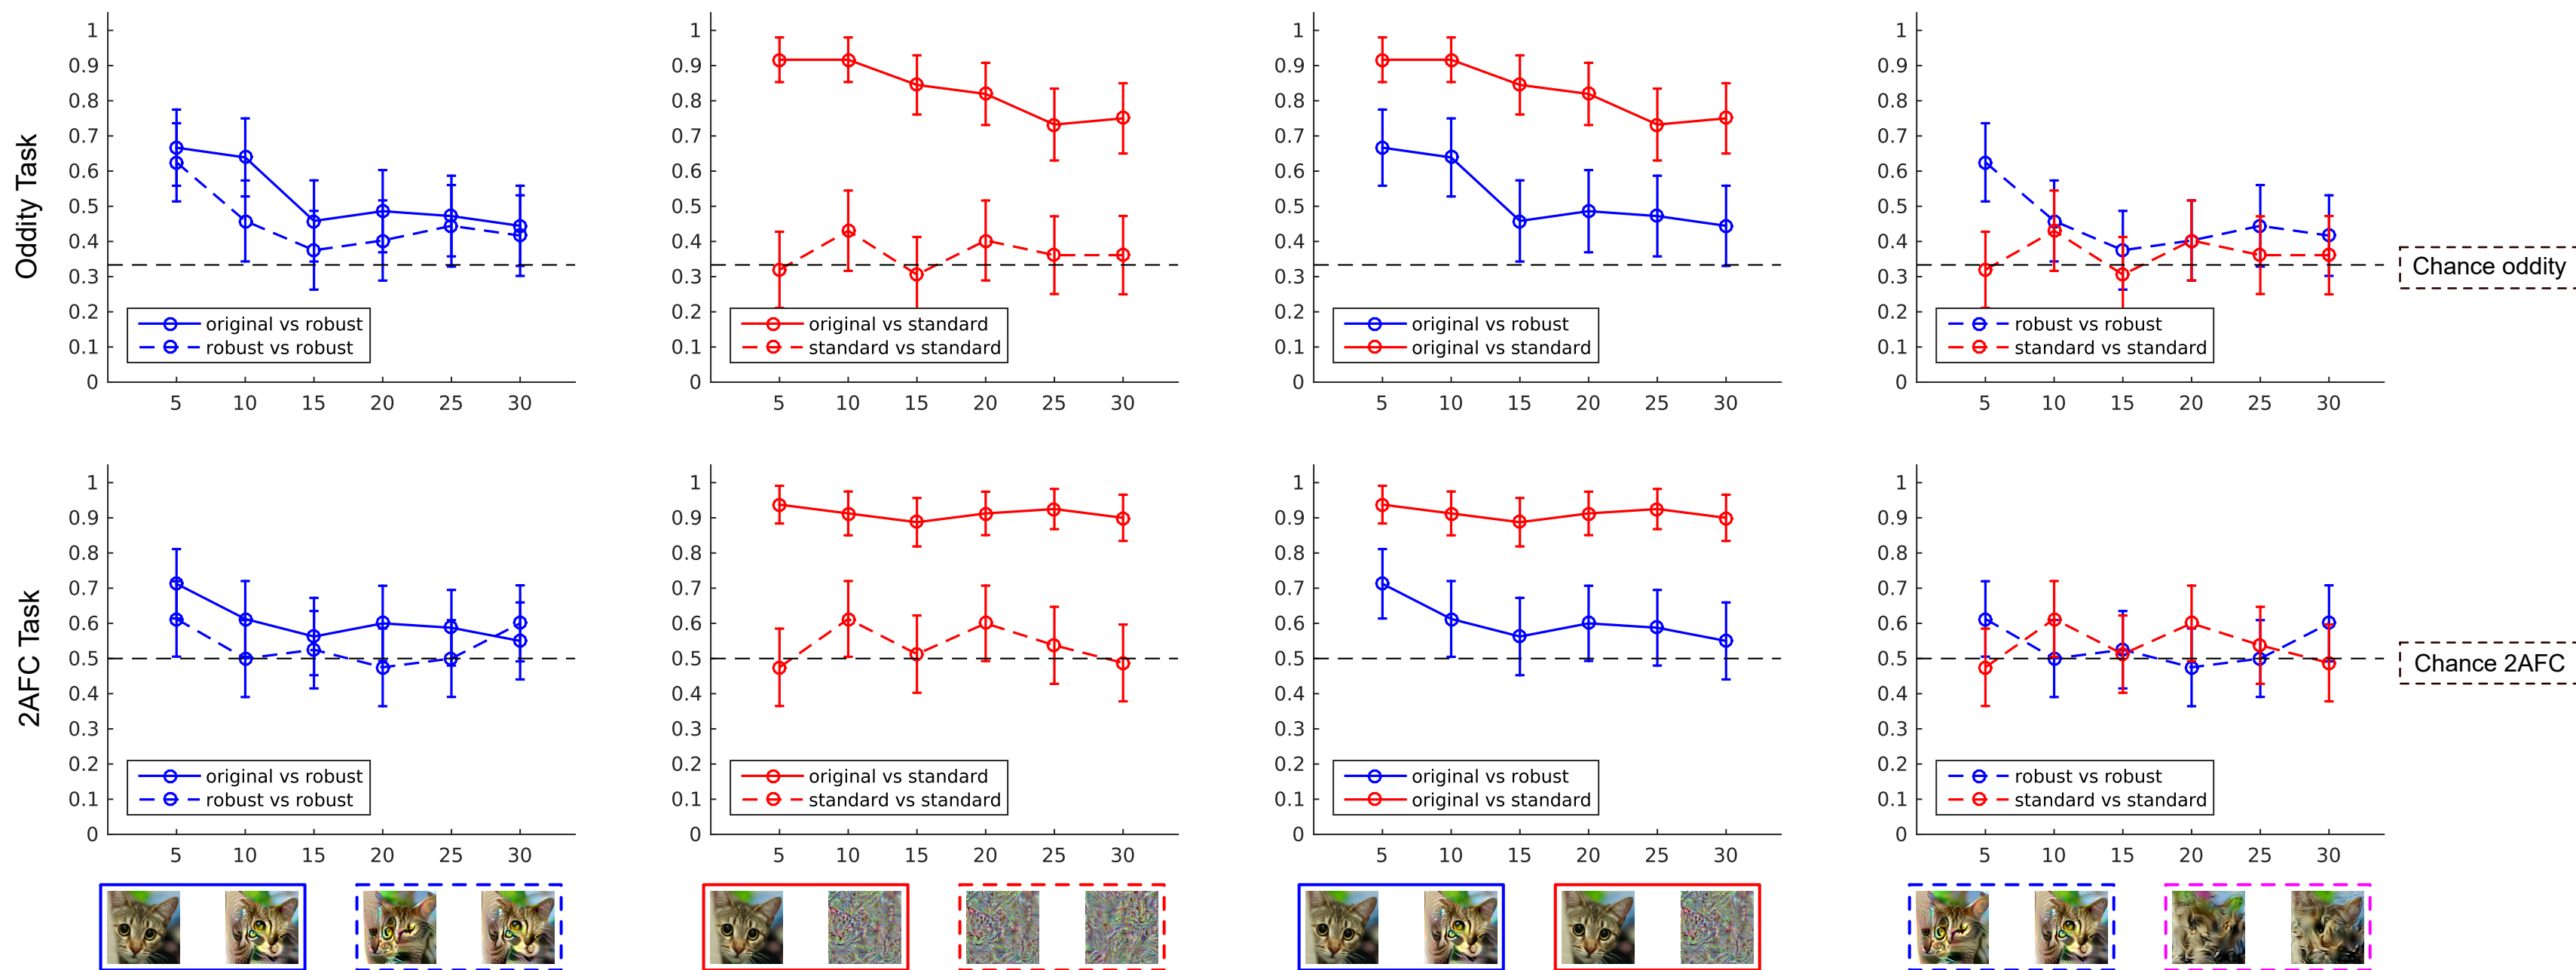

## Robust vs Texform

Proportion Correct

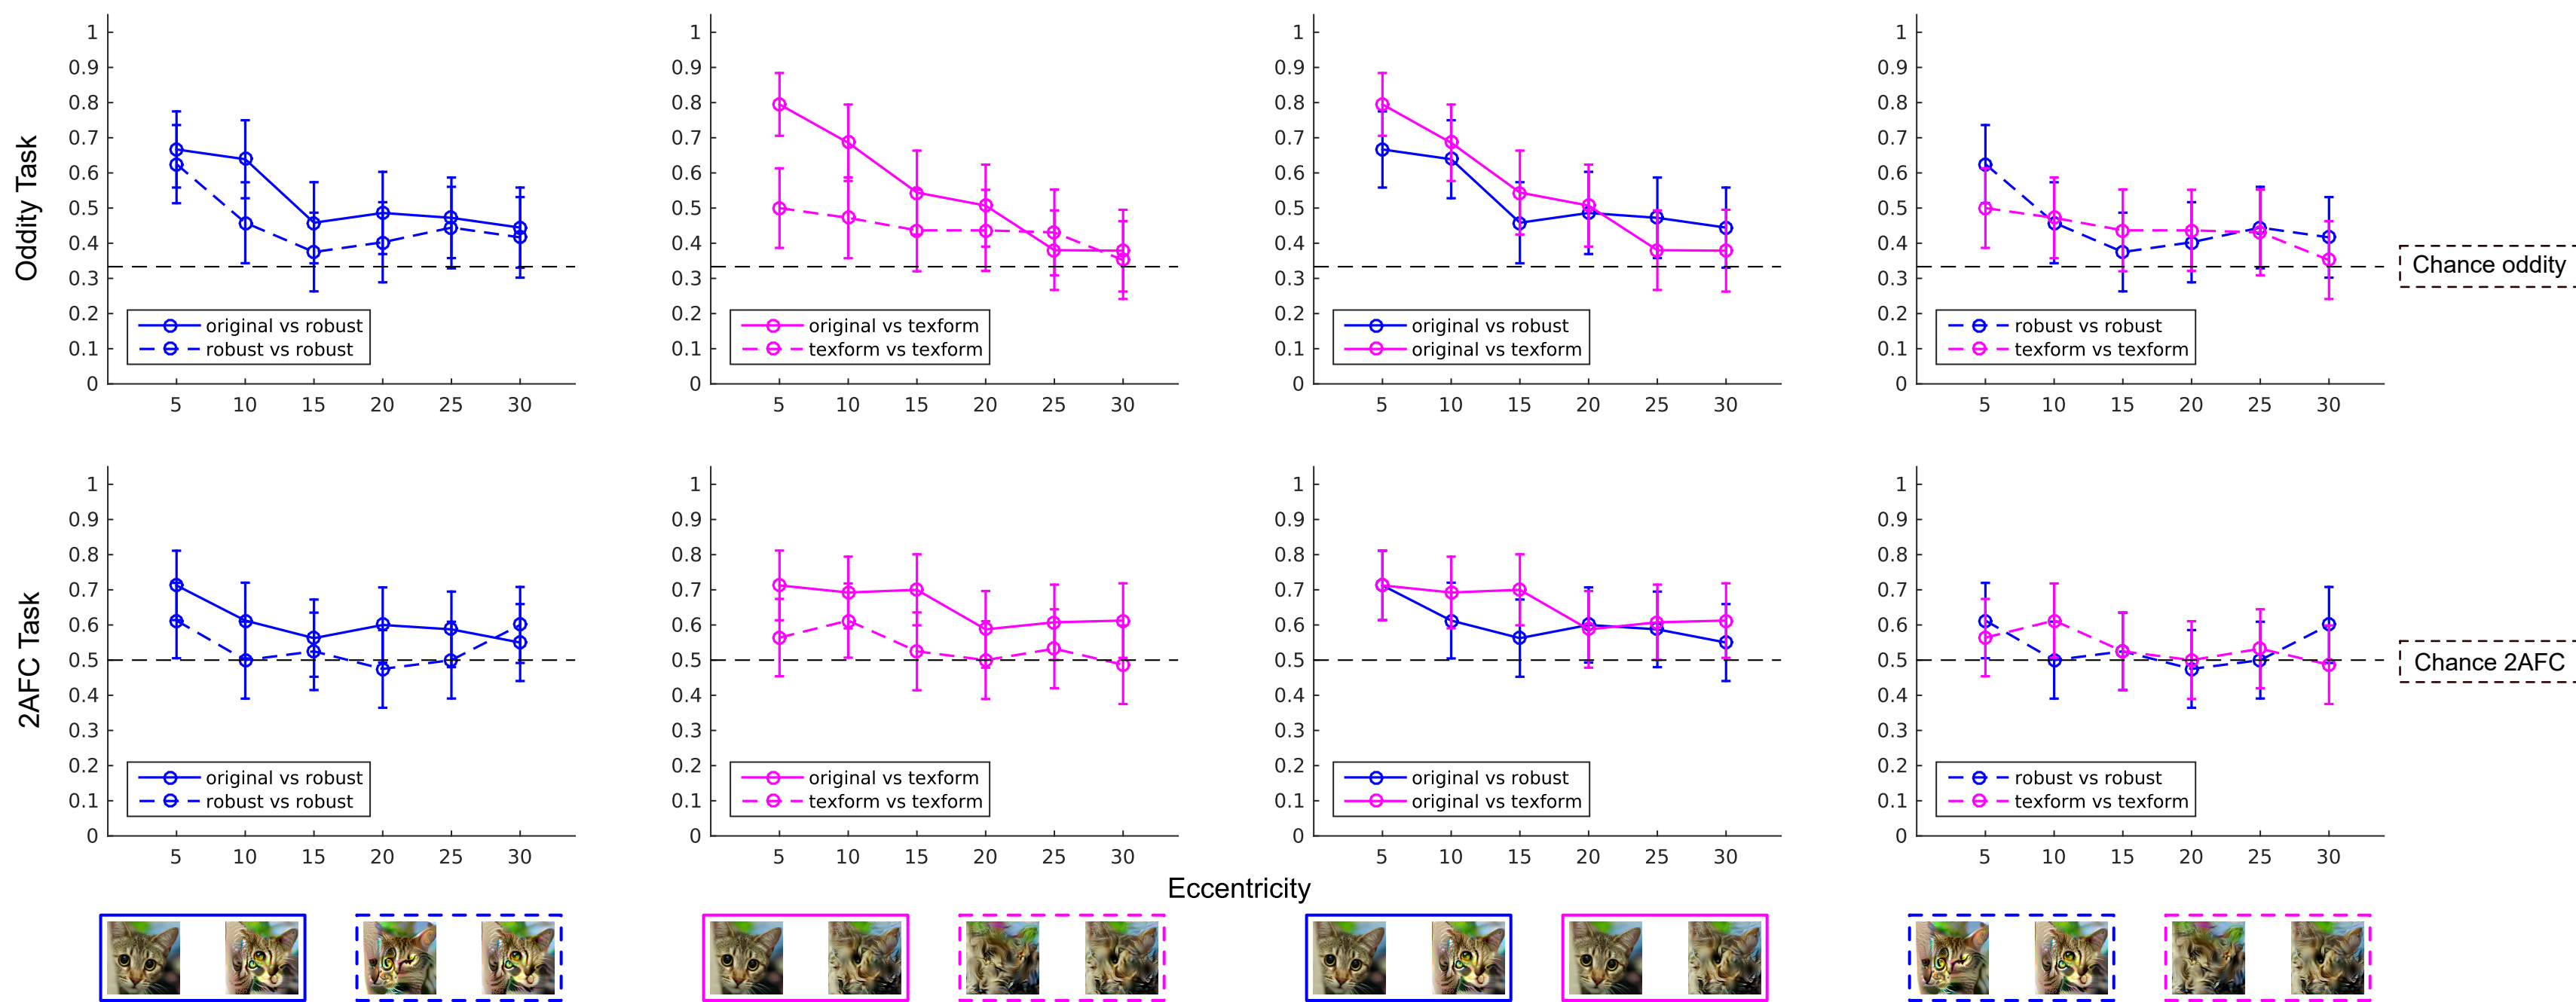

Supplement: supplementary_material [file attachment]

subject 55

## Robust vs Standard

Proportion Correct

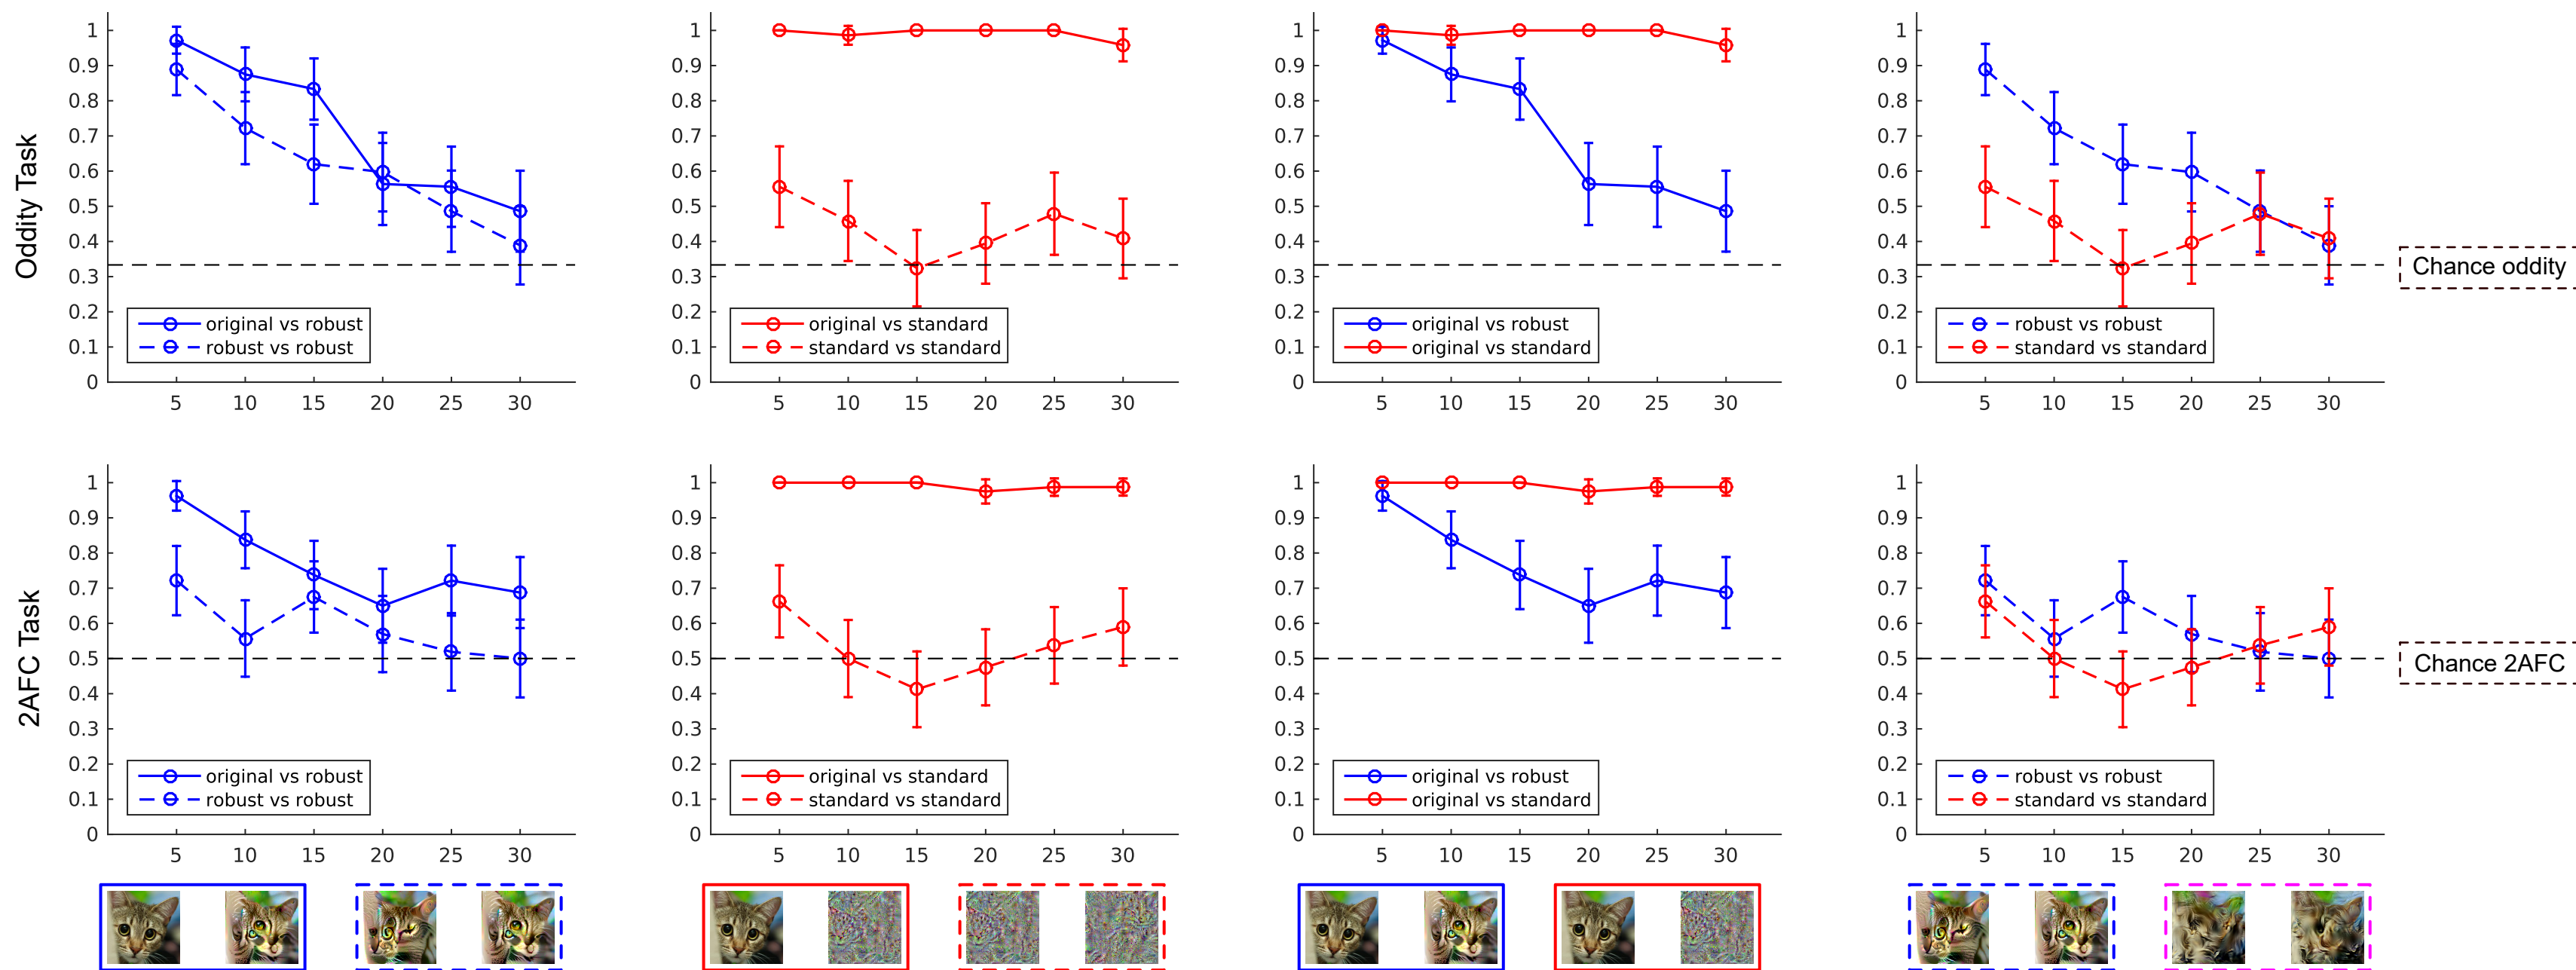

## Robust vs Texform

Proportion Correct

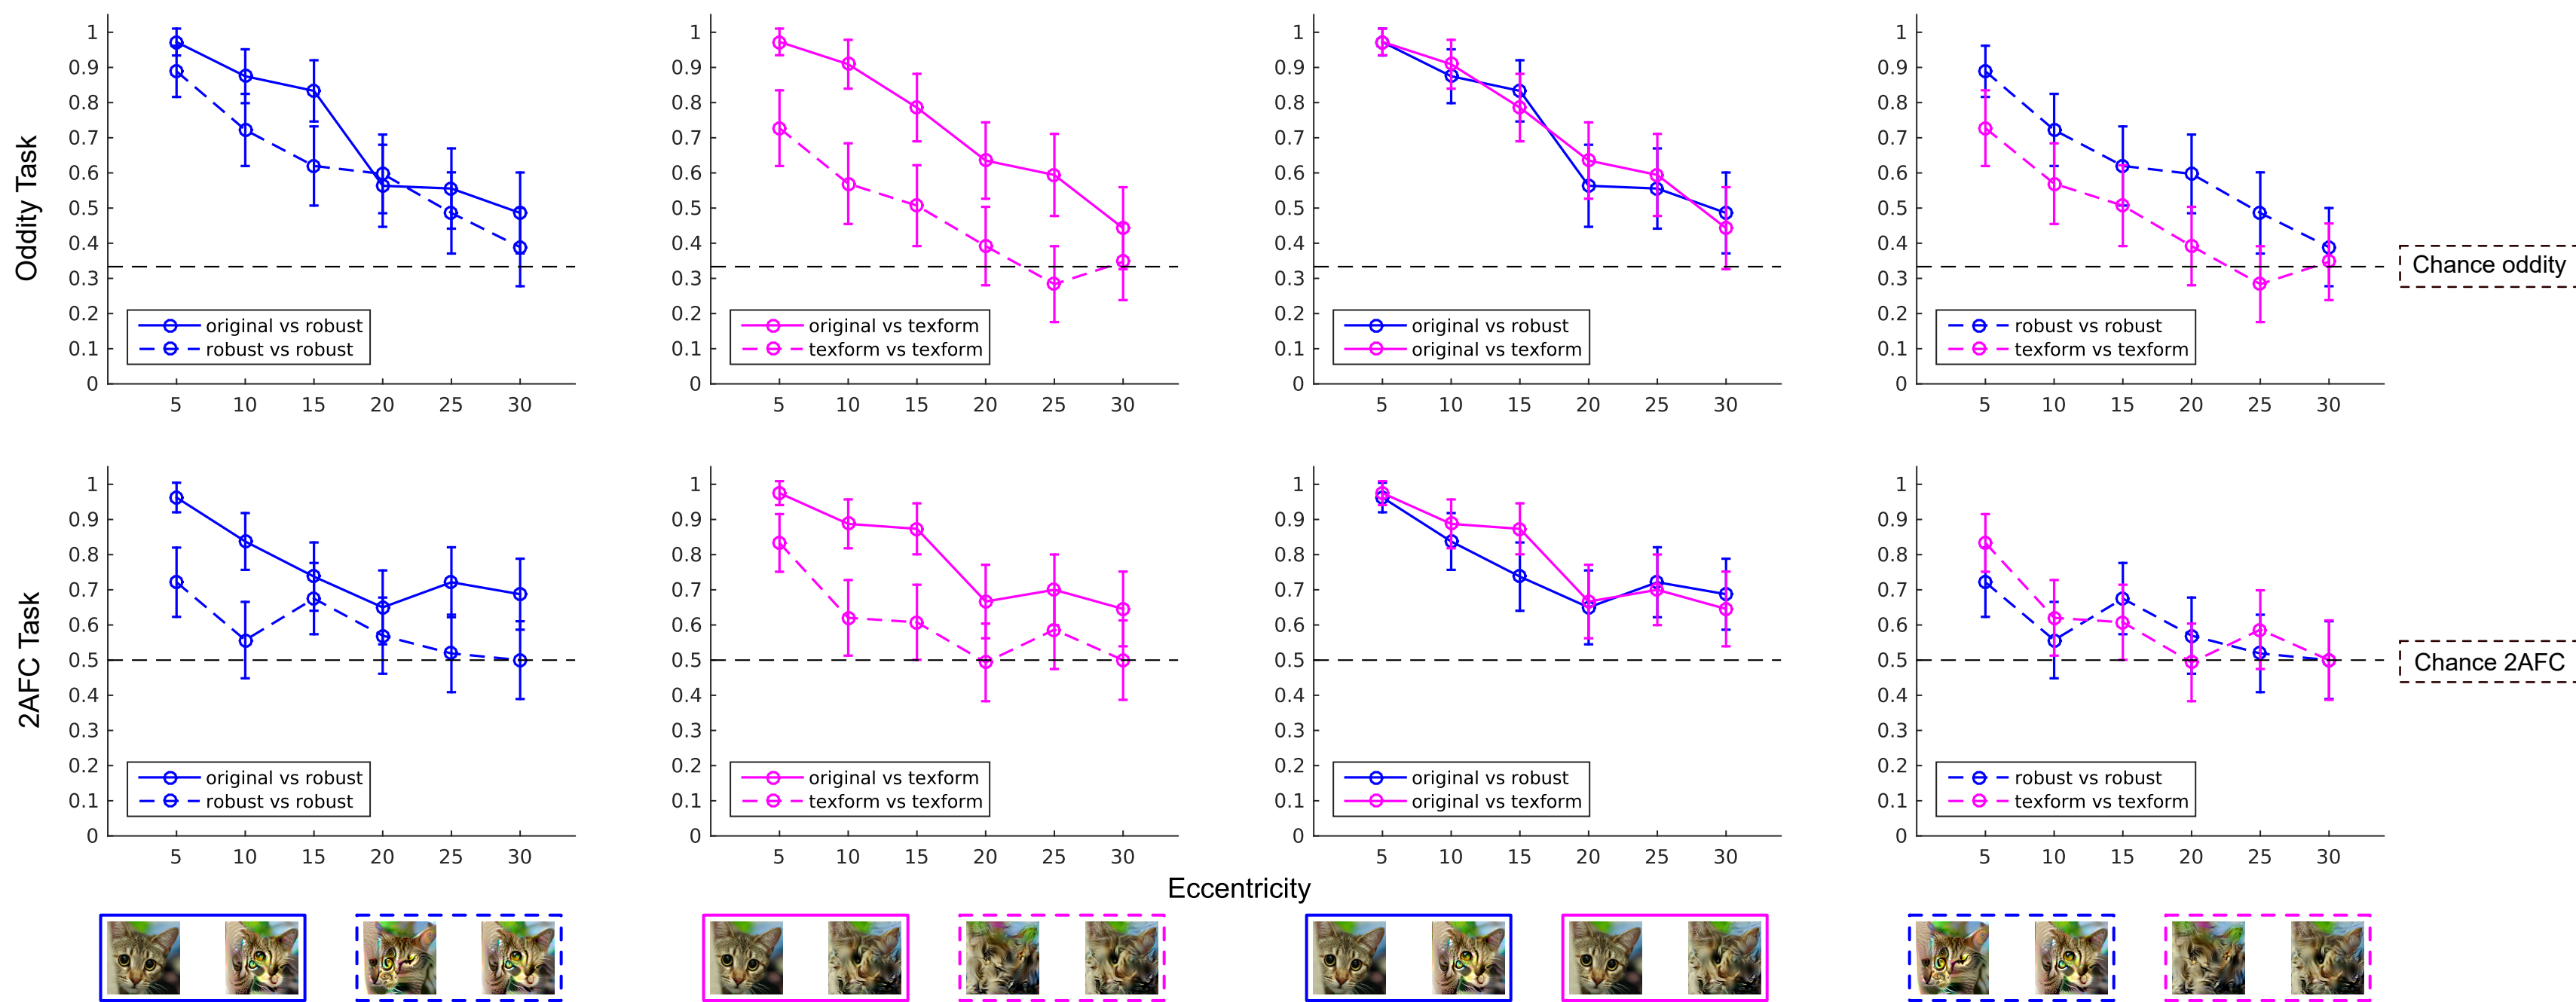

Supplement: supplementary_material [file attachment]

subject 18

## Robust vs Standard

Proportion Correct

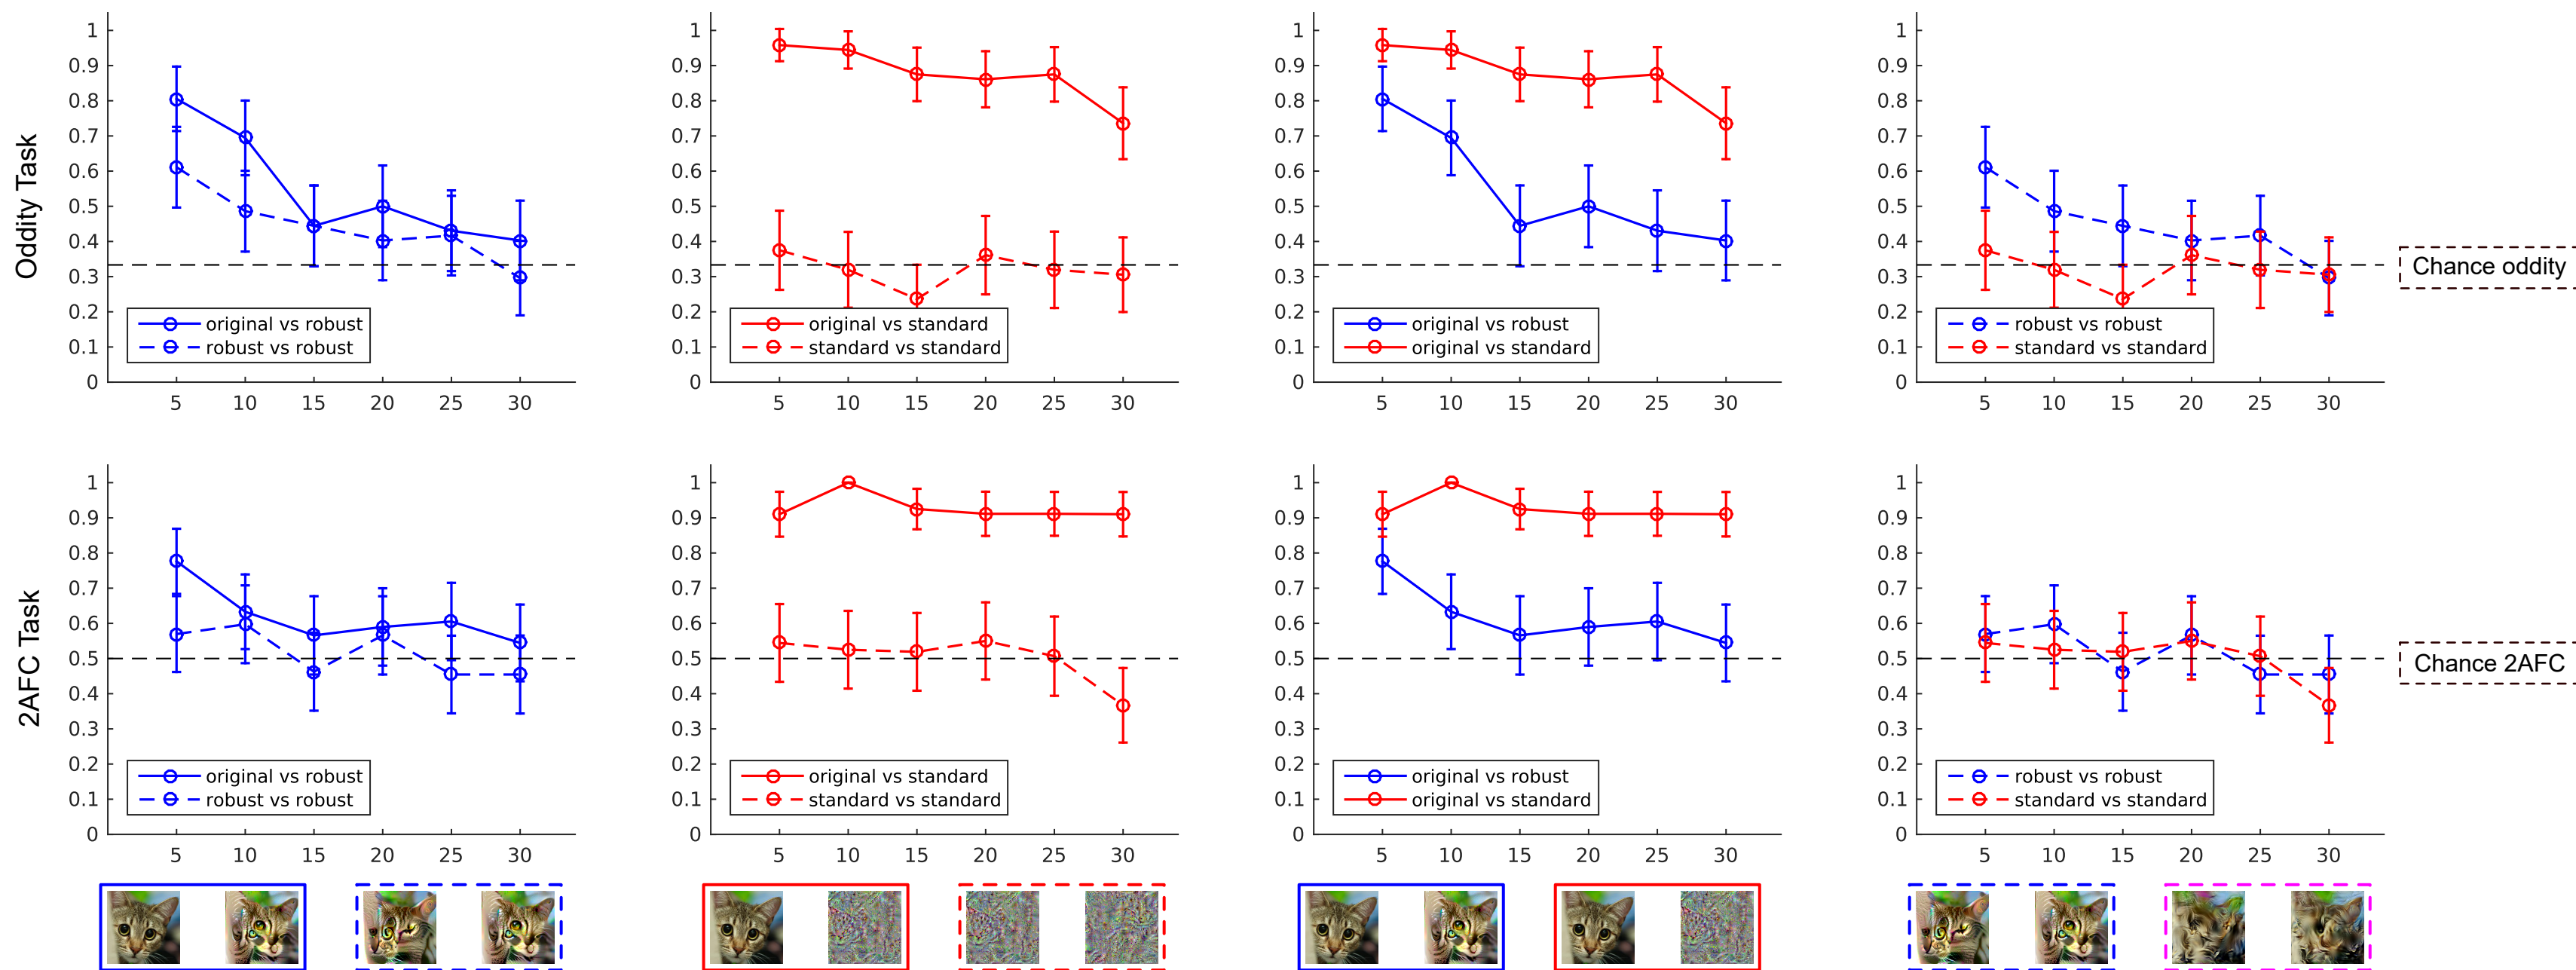

## Robust vs Texform

Proportion Correct

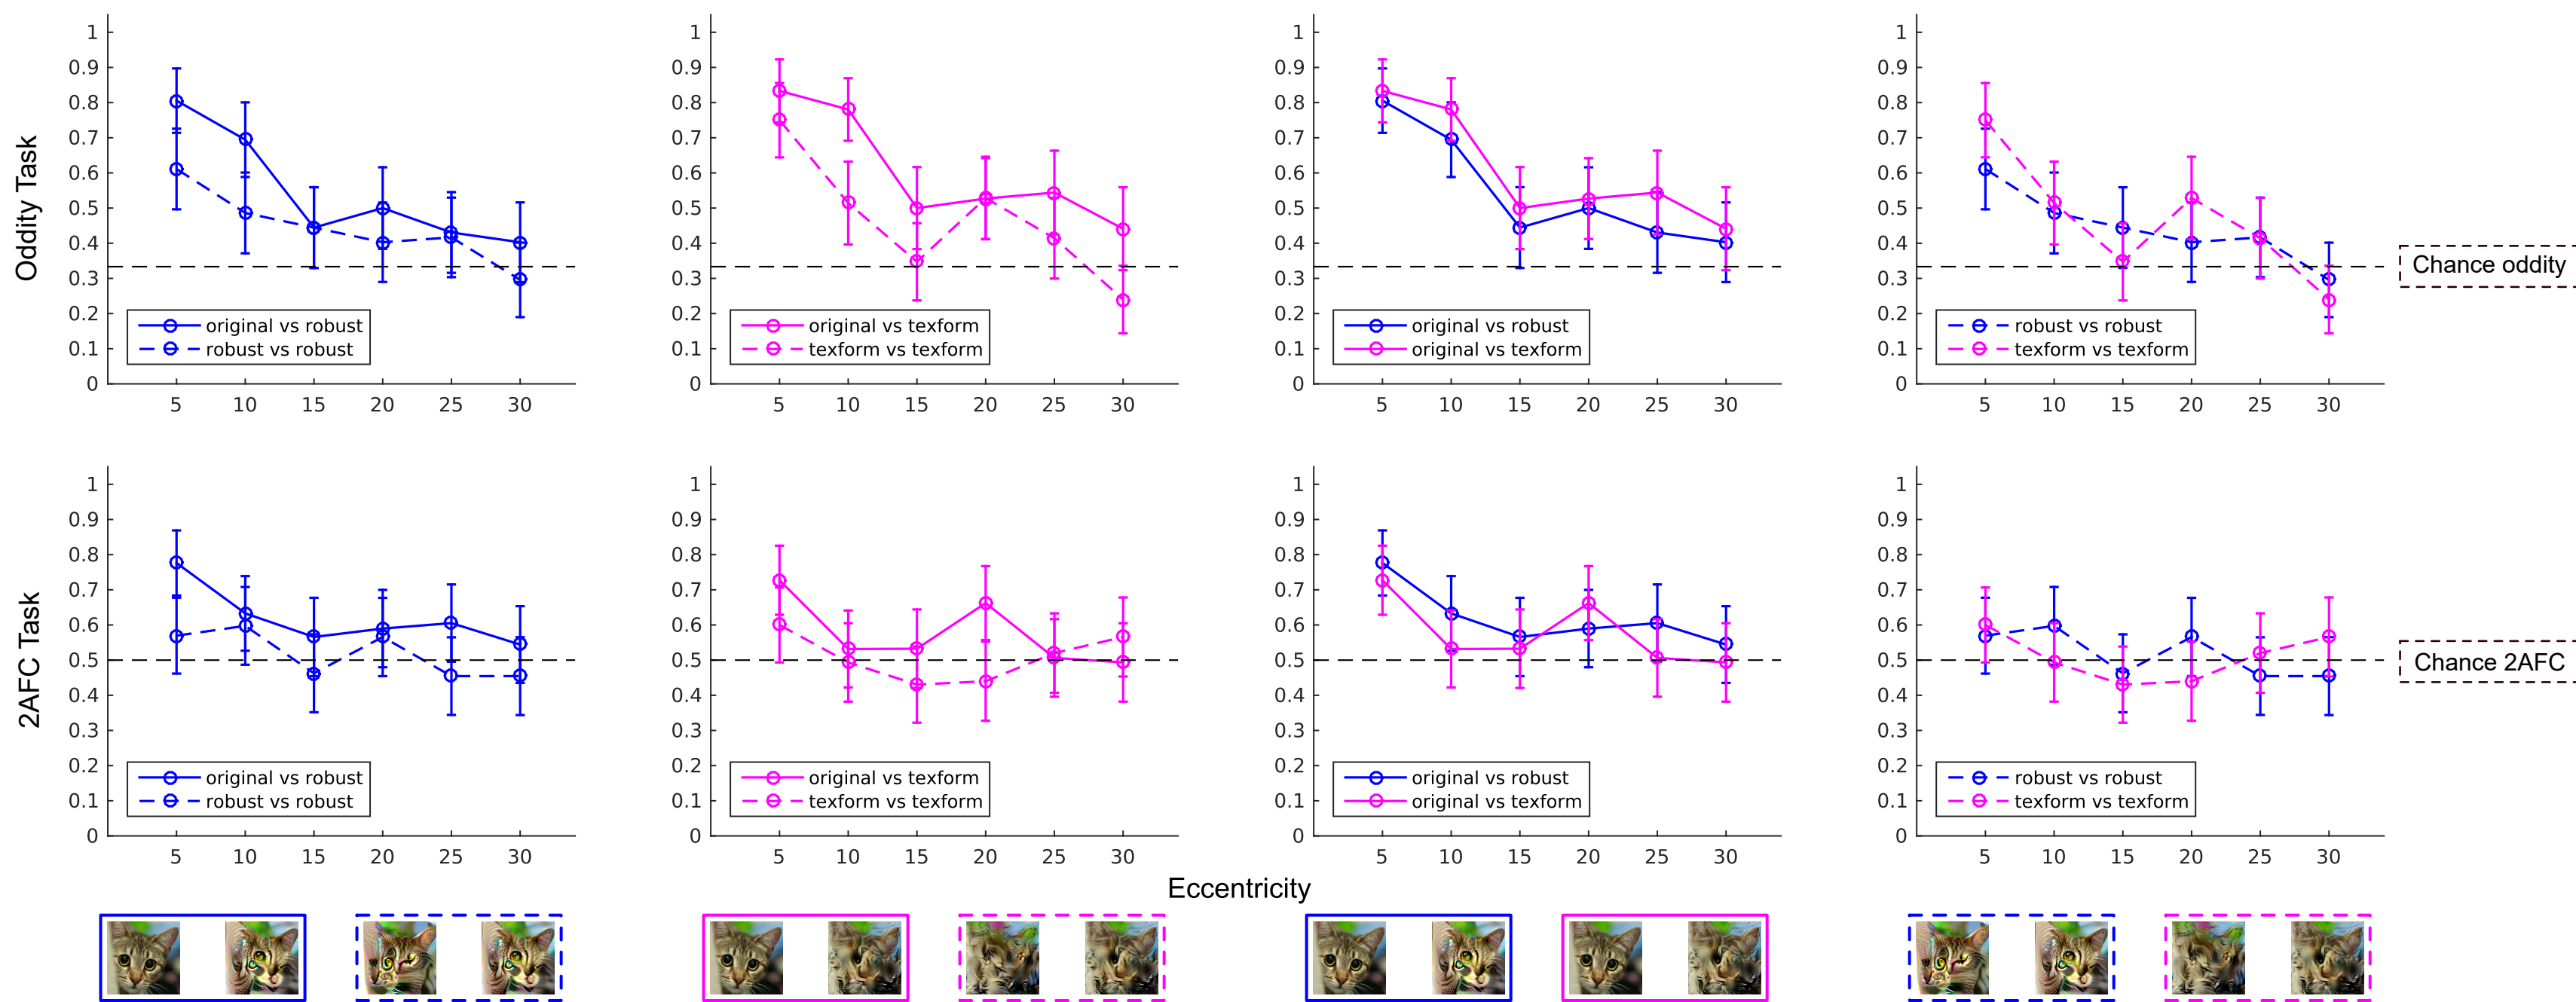

Supplement: supplementary_material [file attachment]

subject 02

## Robust vs Standard

Proportion Correct

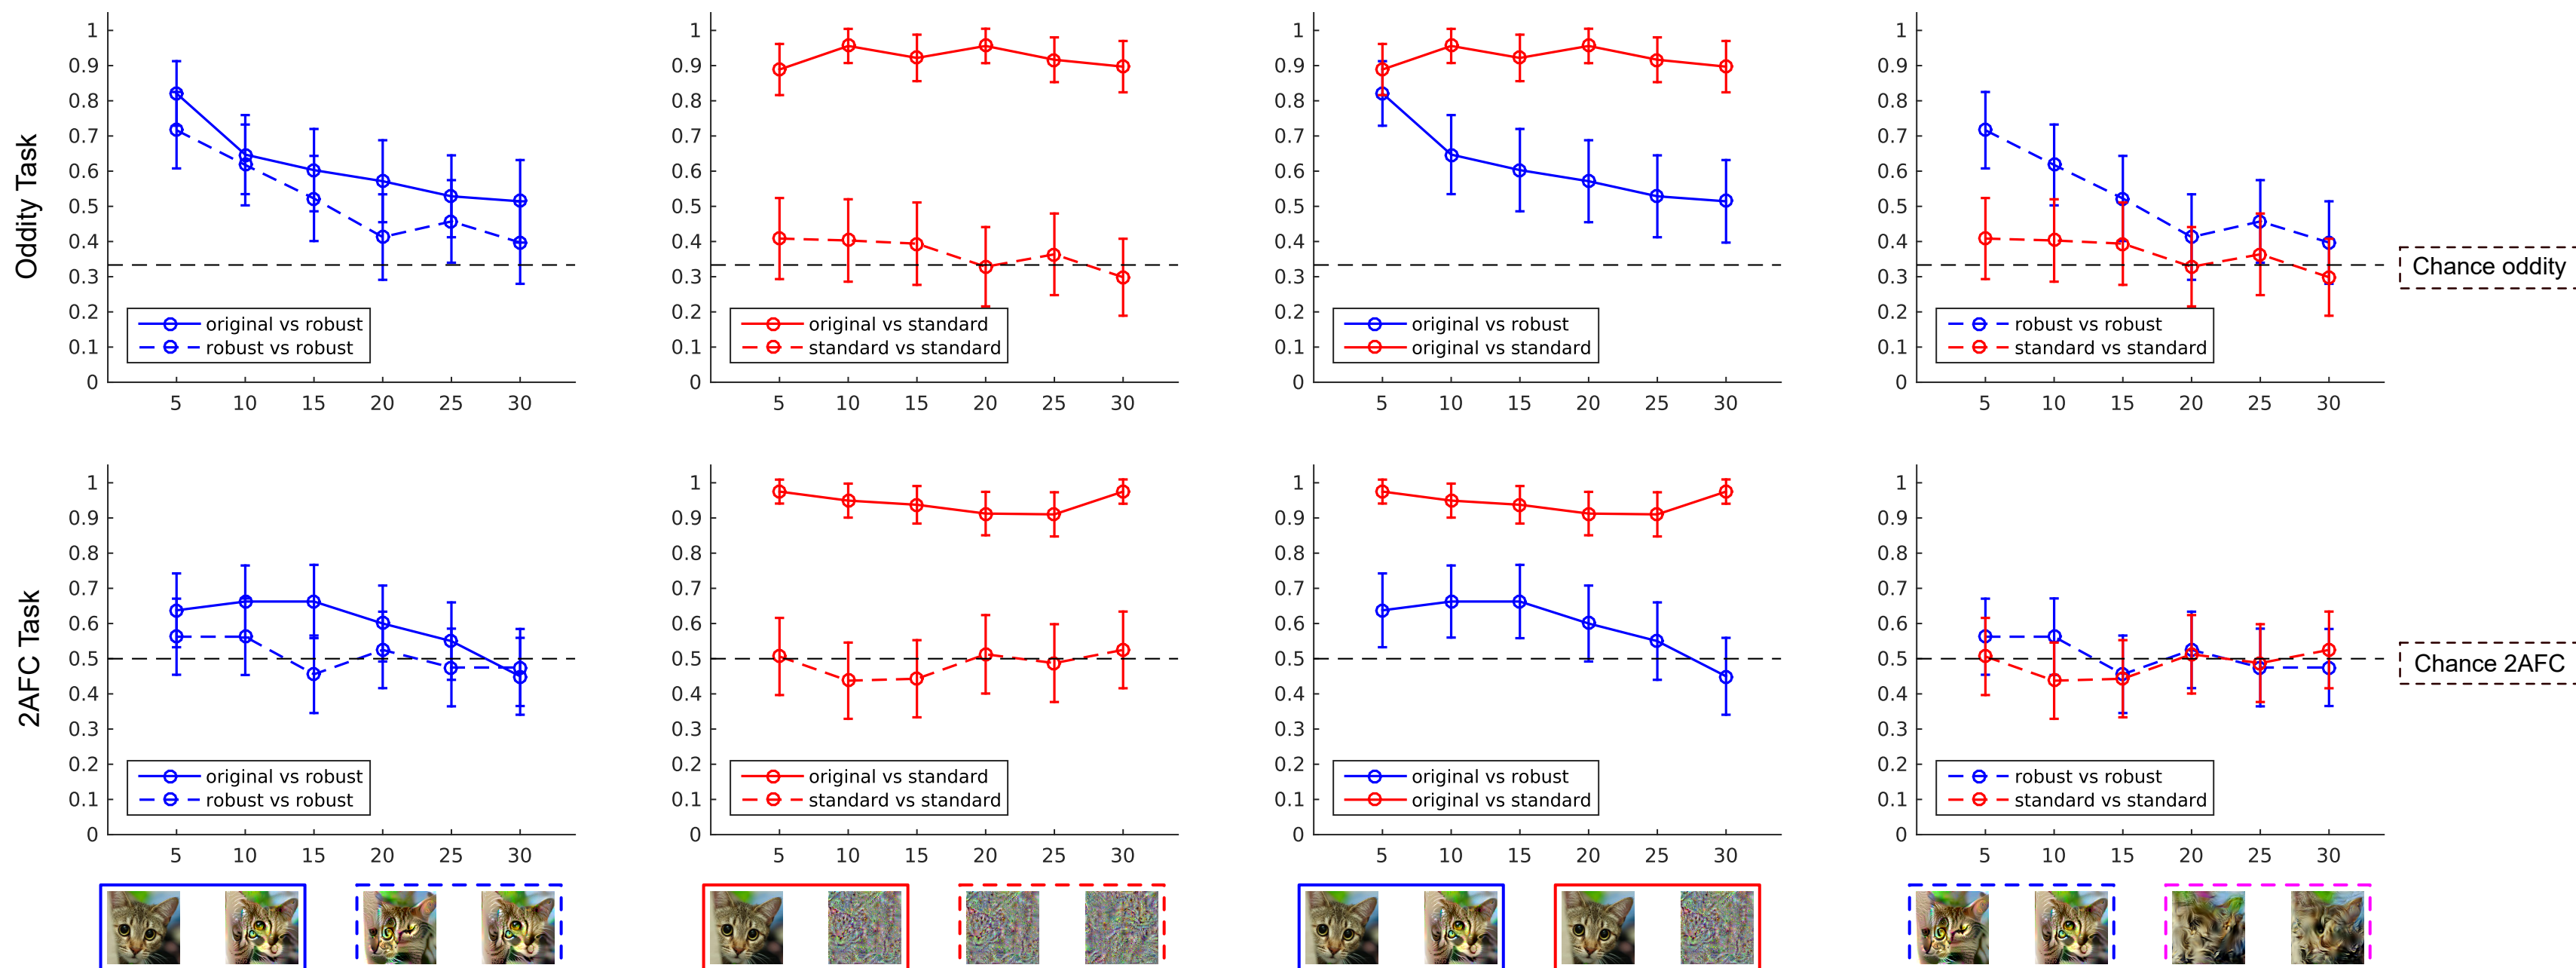

## Robust vs Texform

Proportion Correct

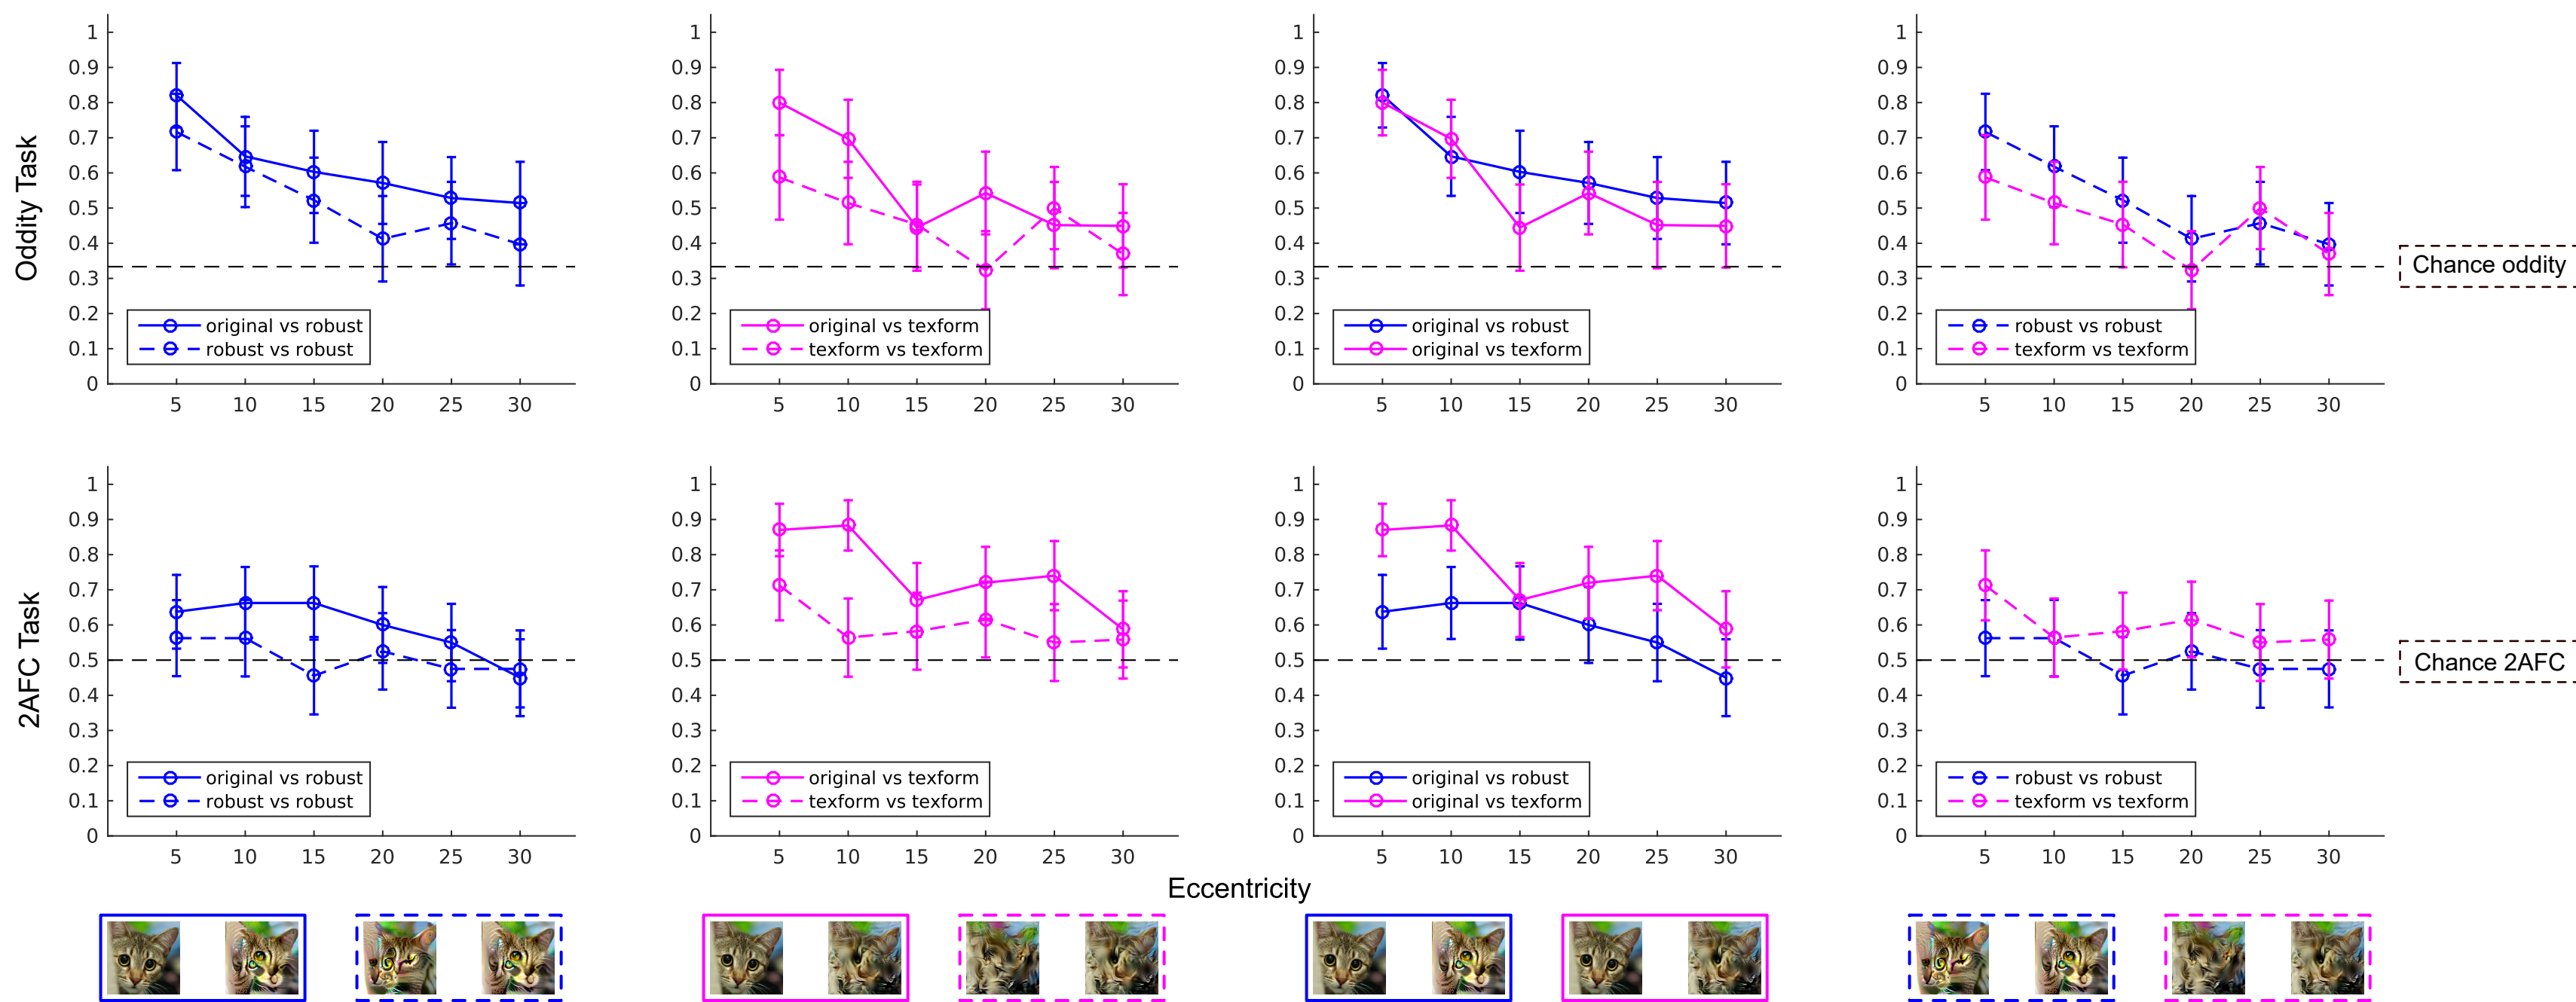

Supplement: supplementary_material [file attachment]

subject 30

## Robust vs Standard

Proportion Correct

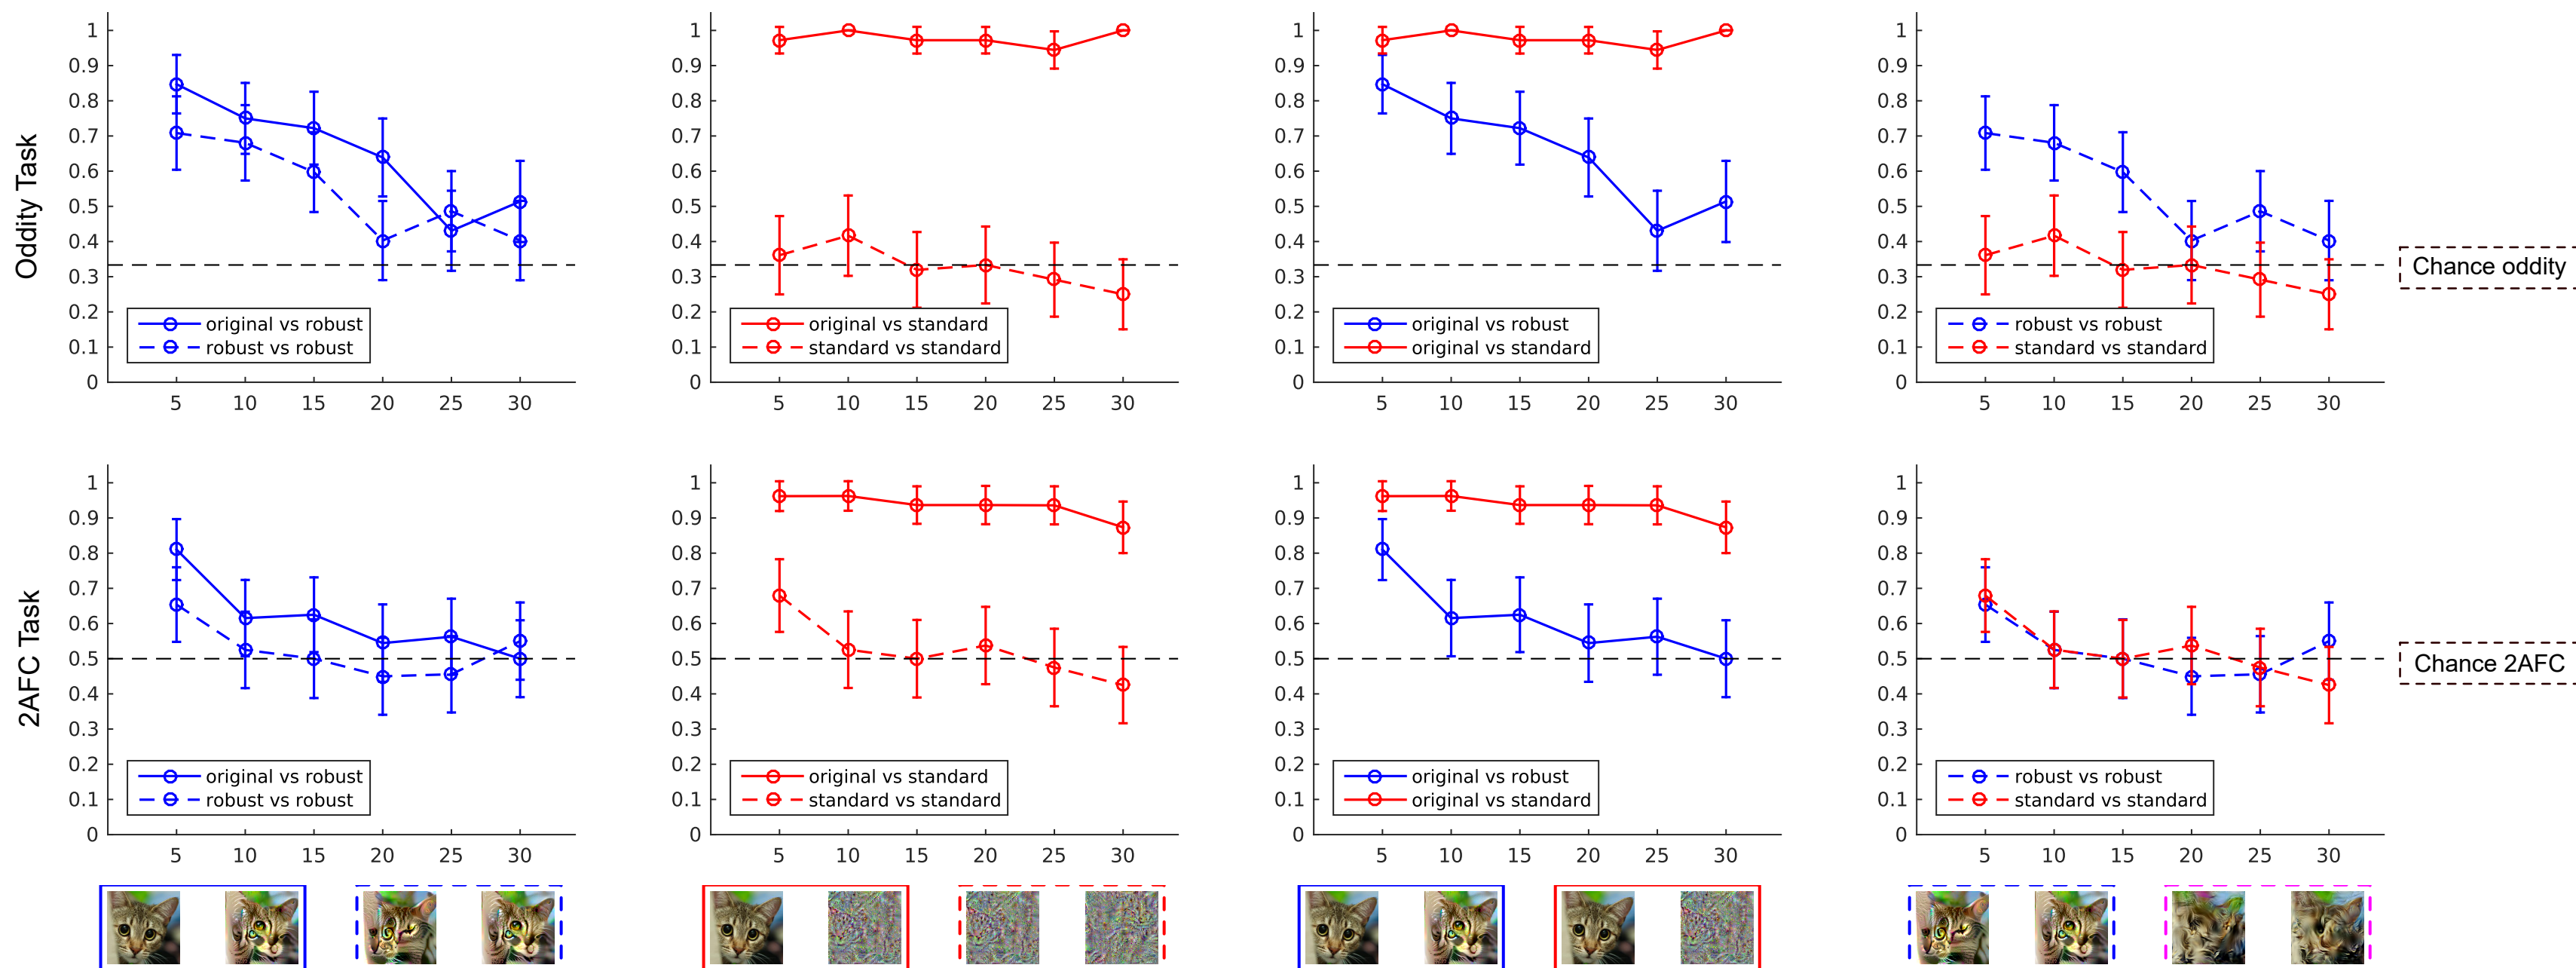

## Robust vs Texform

Proportion Correct

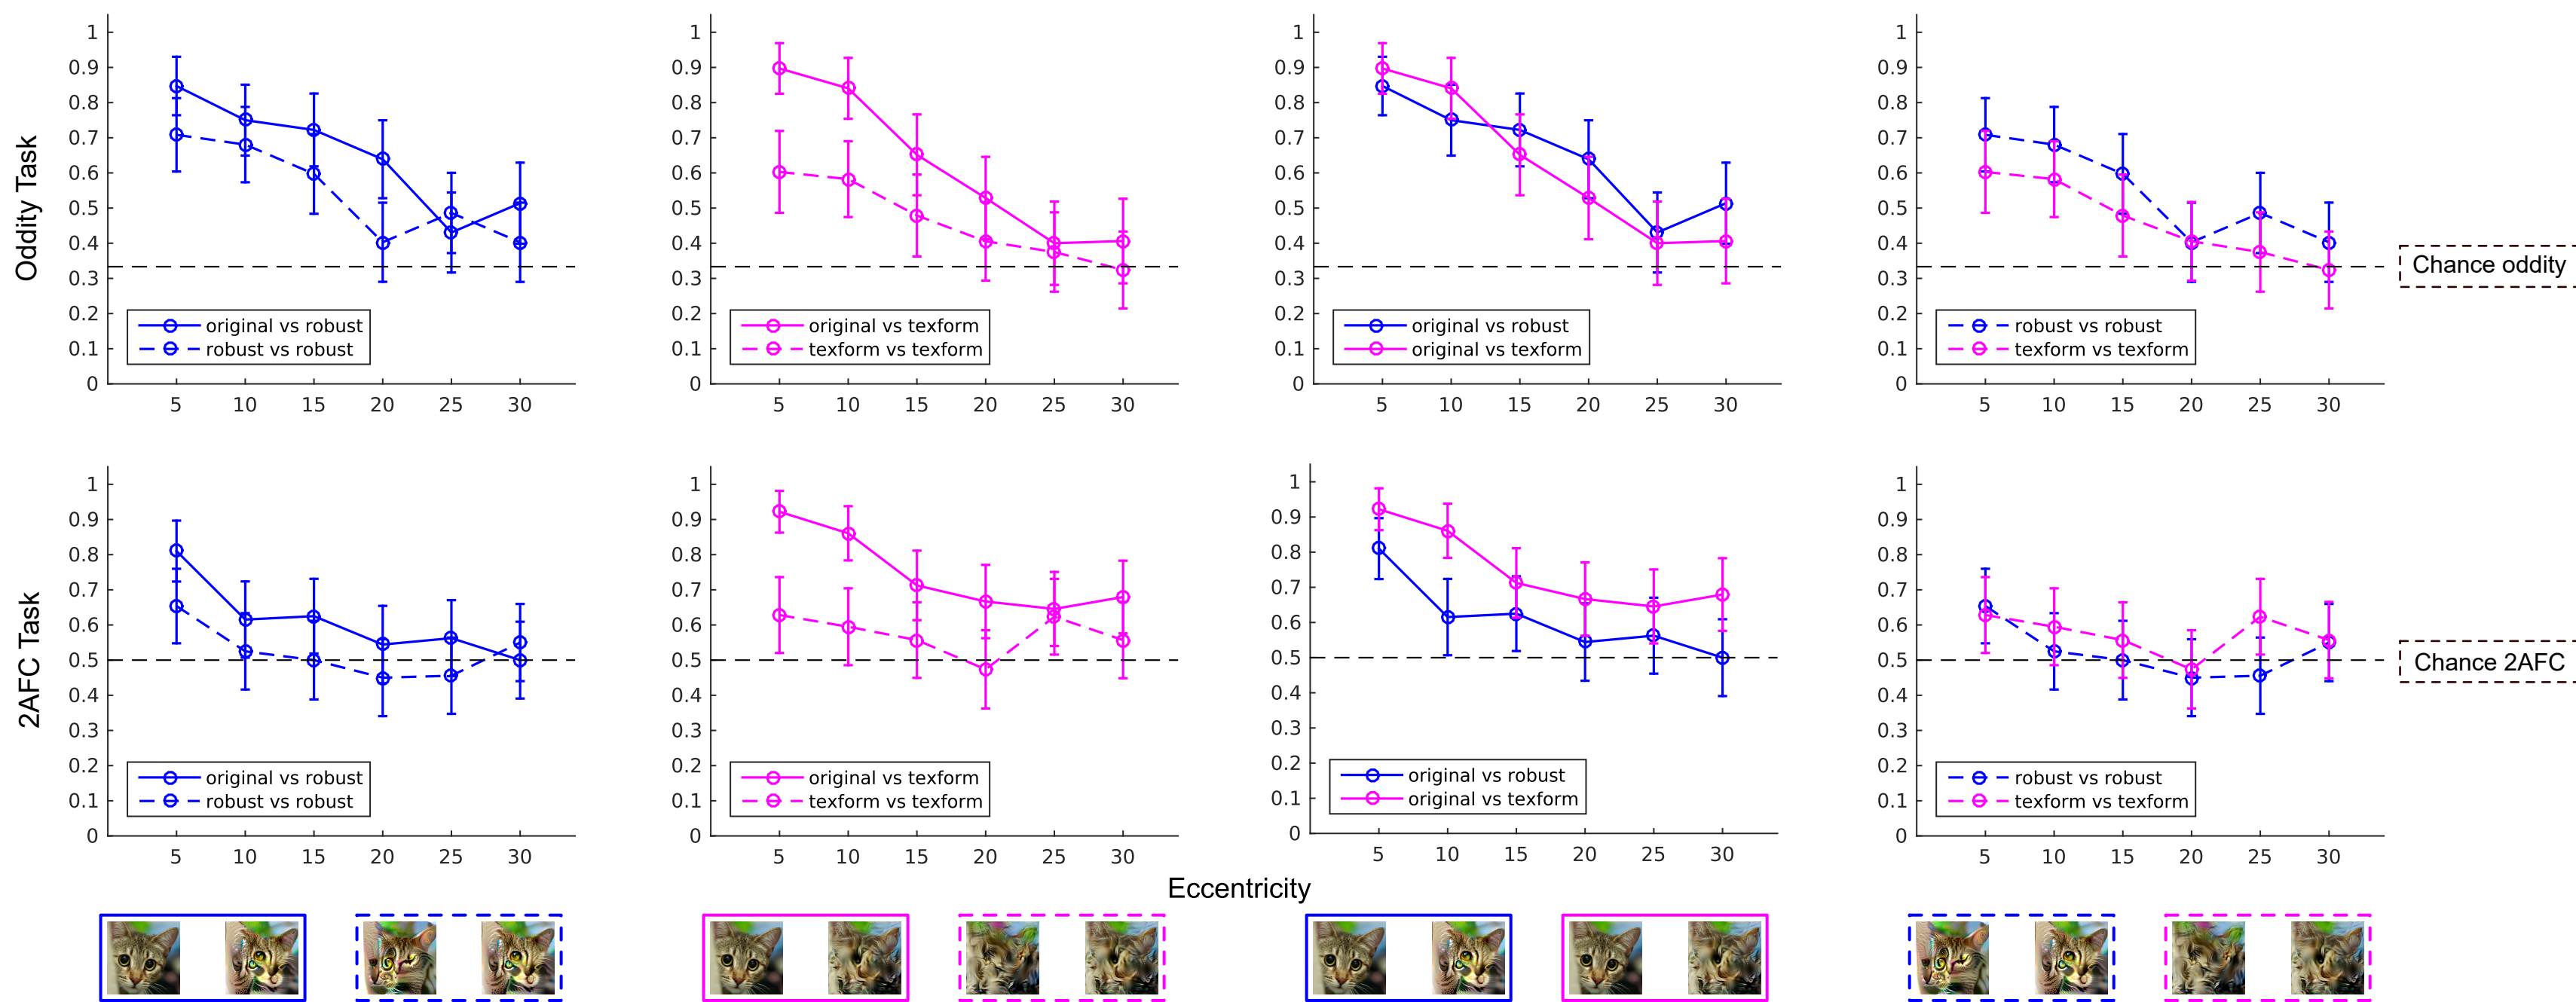

Supplement: supplementary_material [file attachment]

subject 03

## Robust vs Standard

Proportion Correct

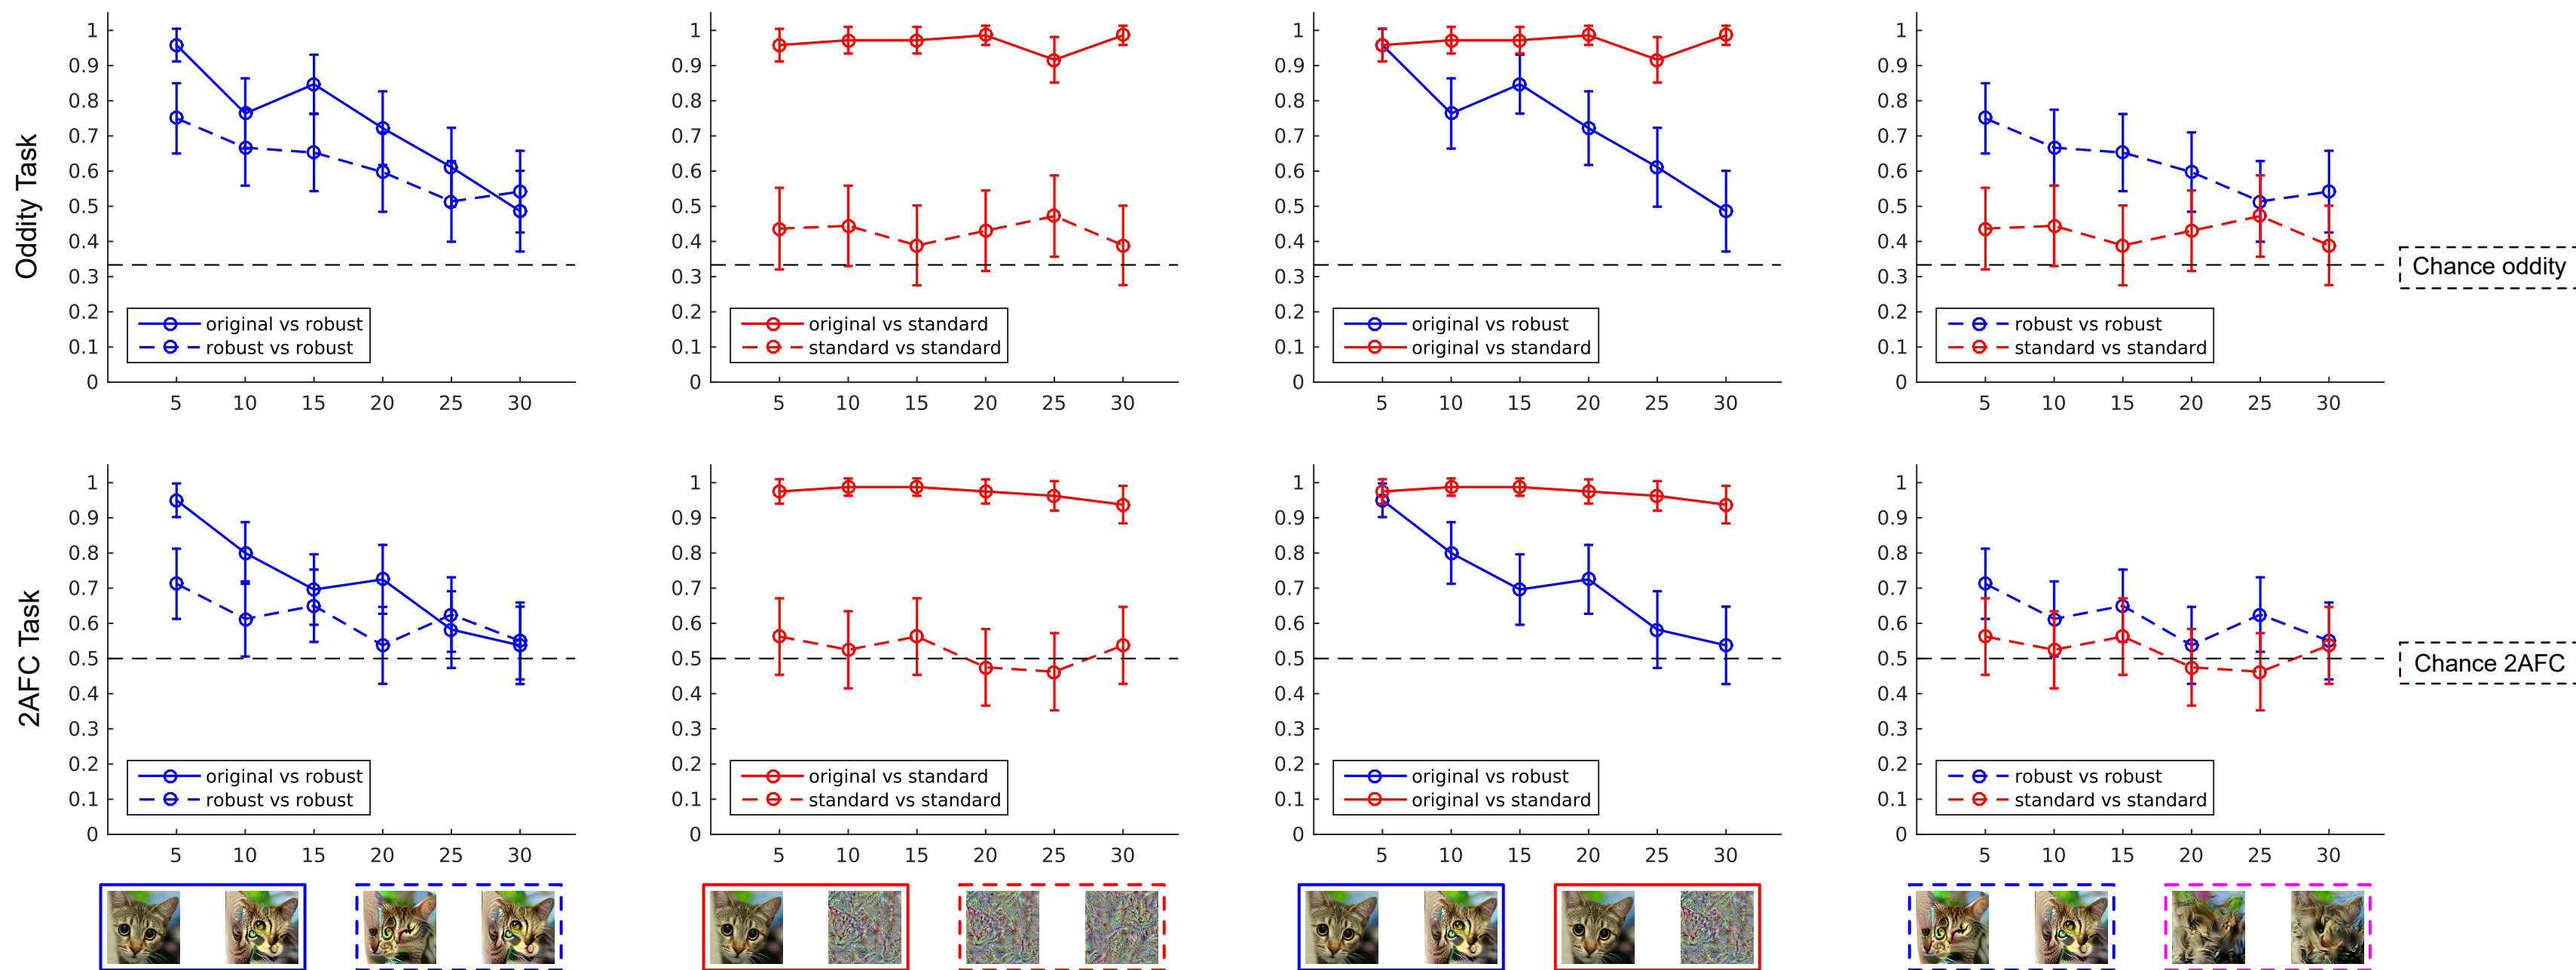

## Robust vs Texform

Proportion Correct

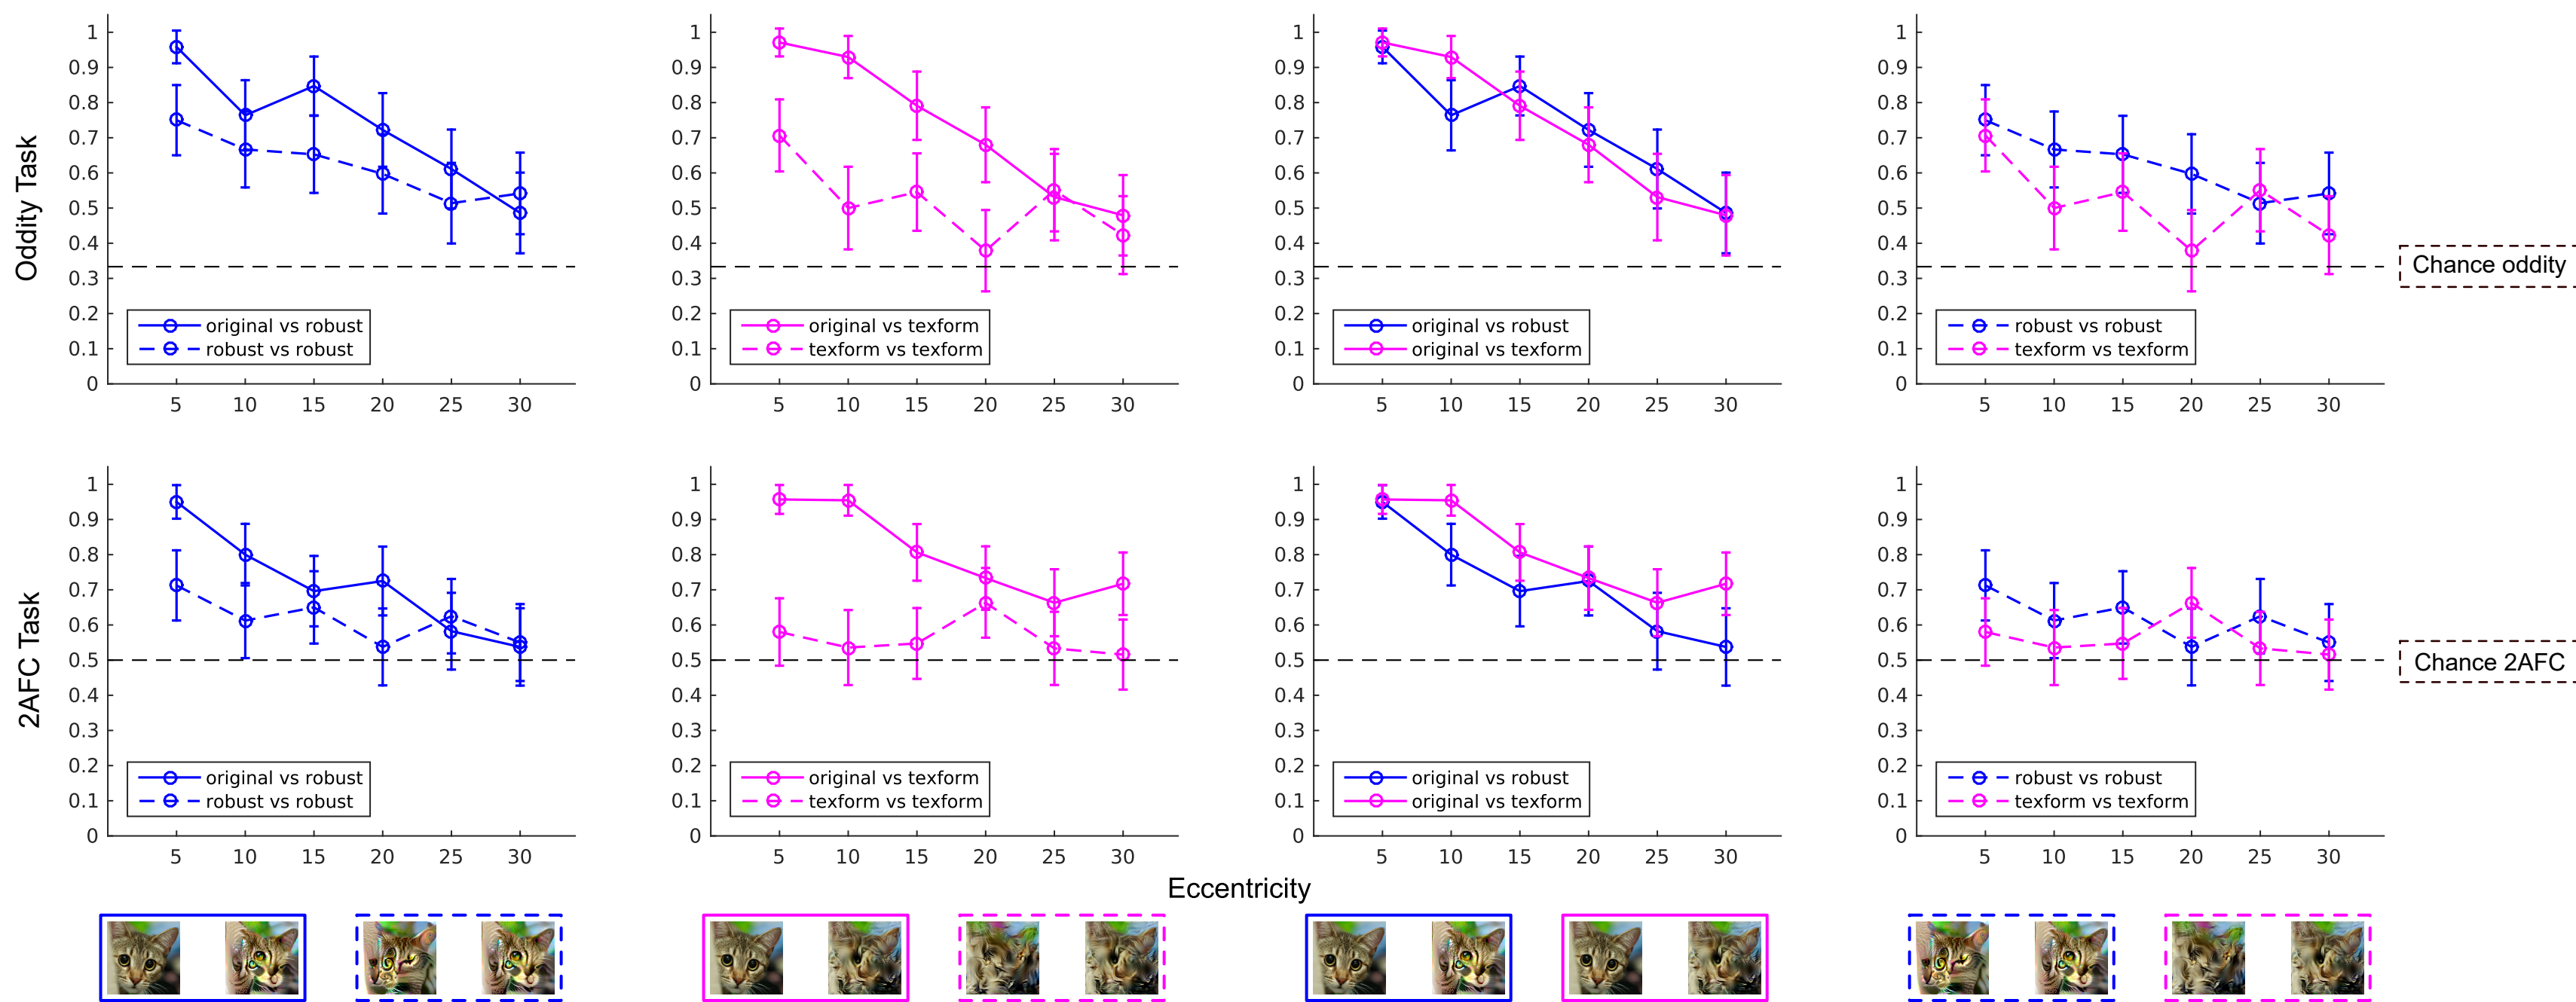

Supplement: supplementary_material [file attachment]

subject 63

## Robust vs Standard

Proportion Correct

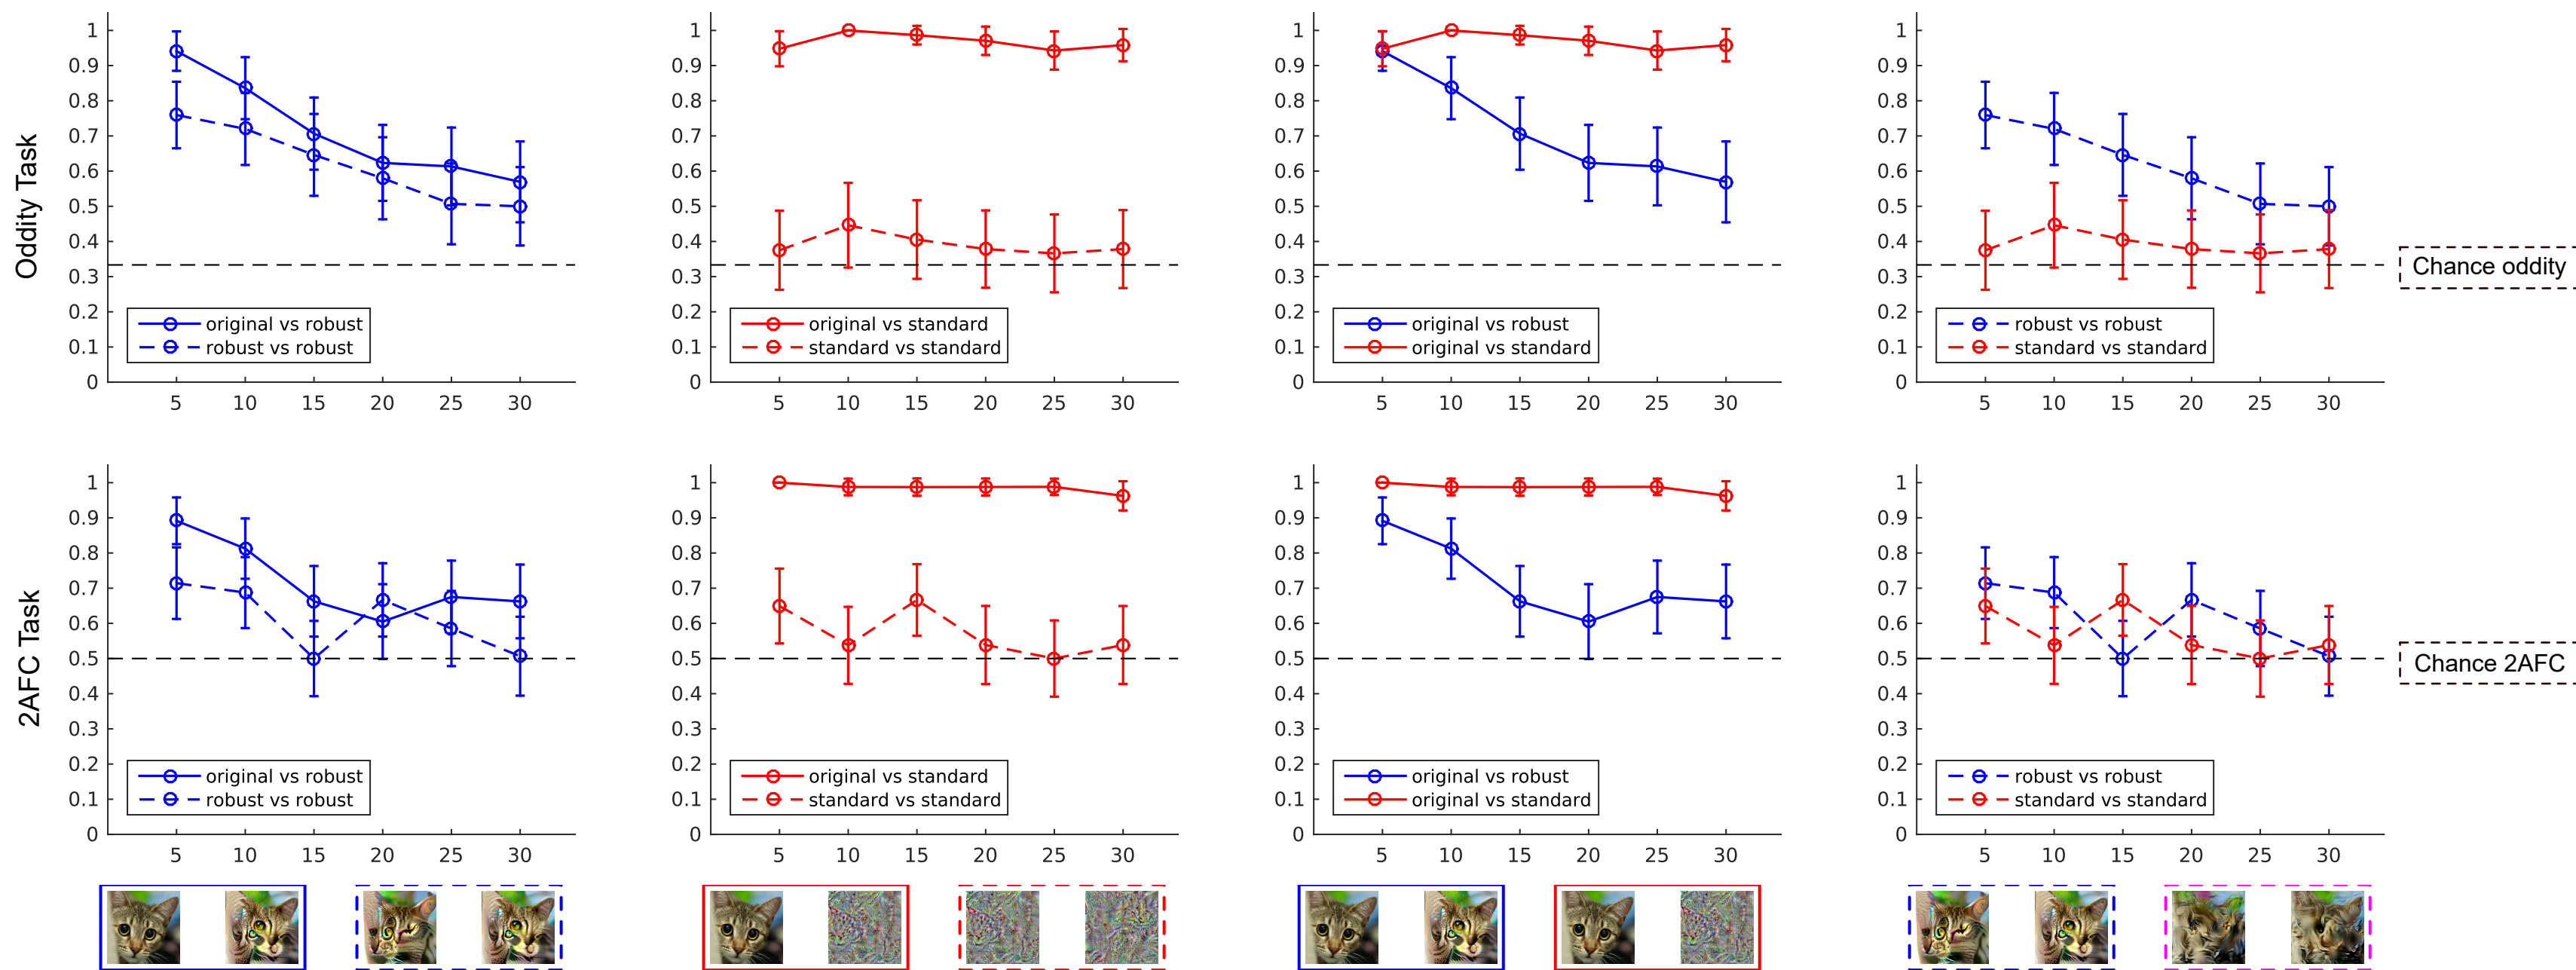

## Robust vs Texform

Proportion Correct

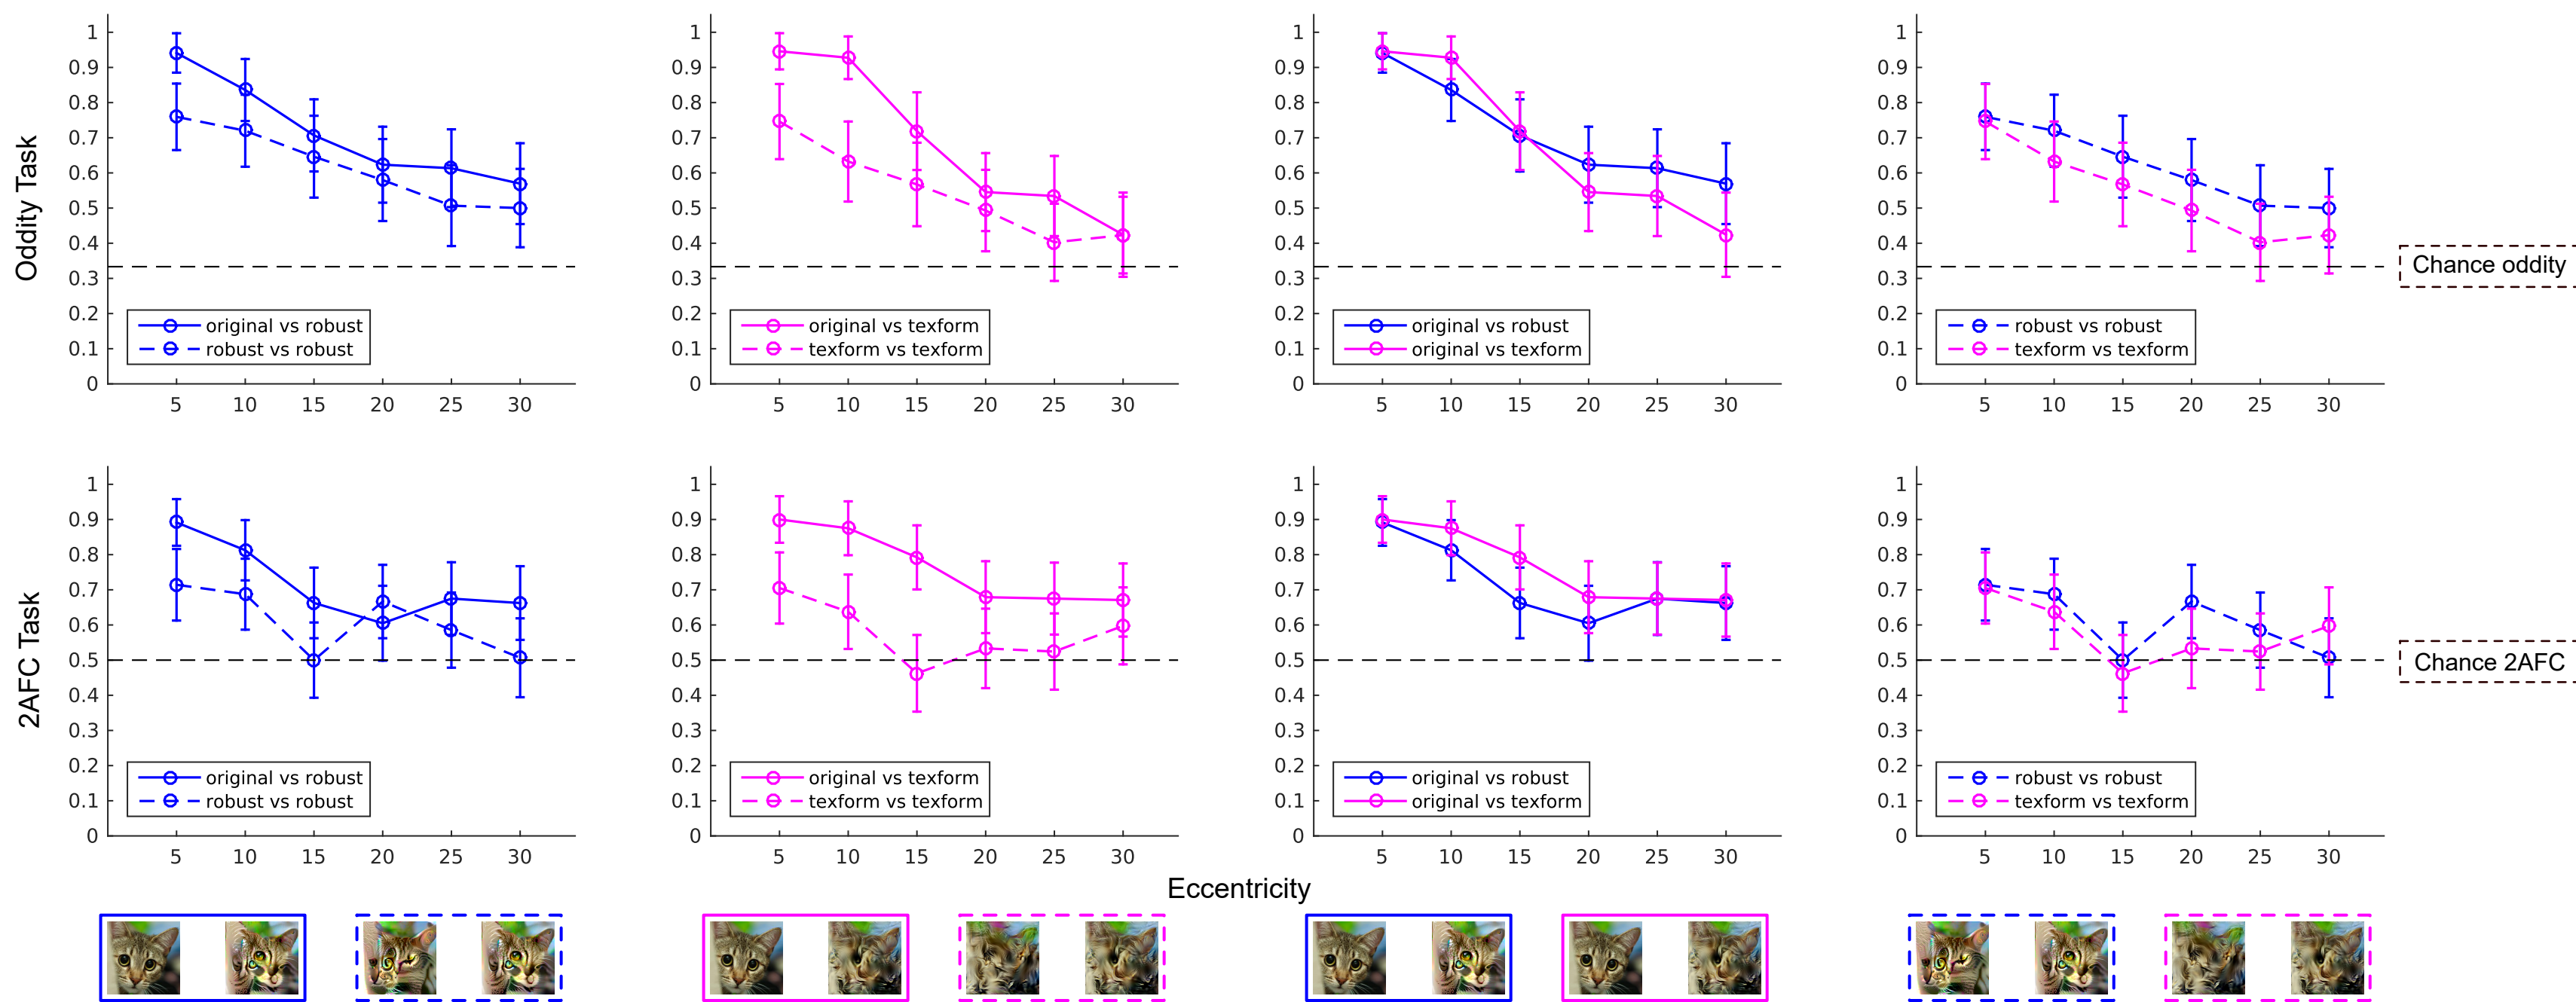

Supplement: supplementary_material [file attachment]

subject 75

Robust vs Standard

Proportion Correct

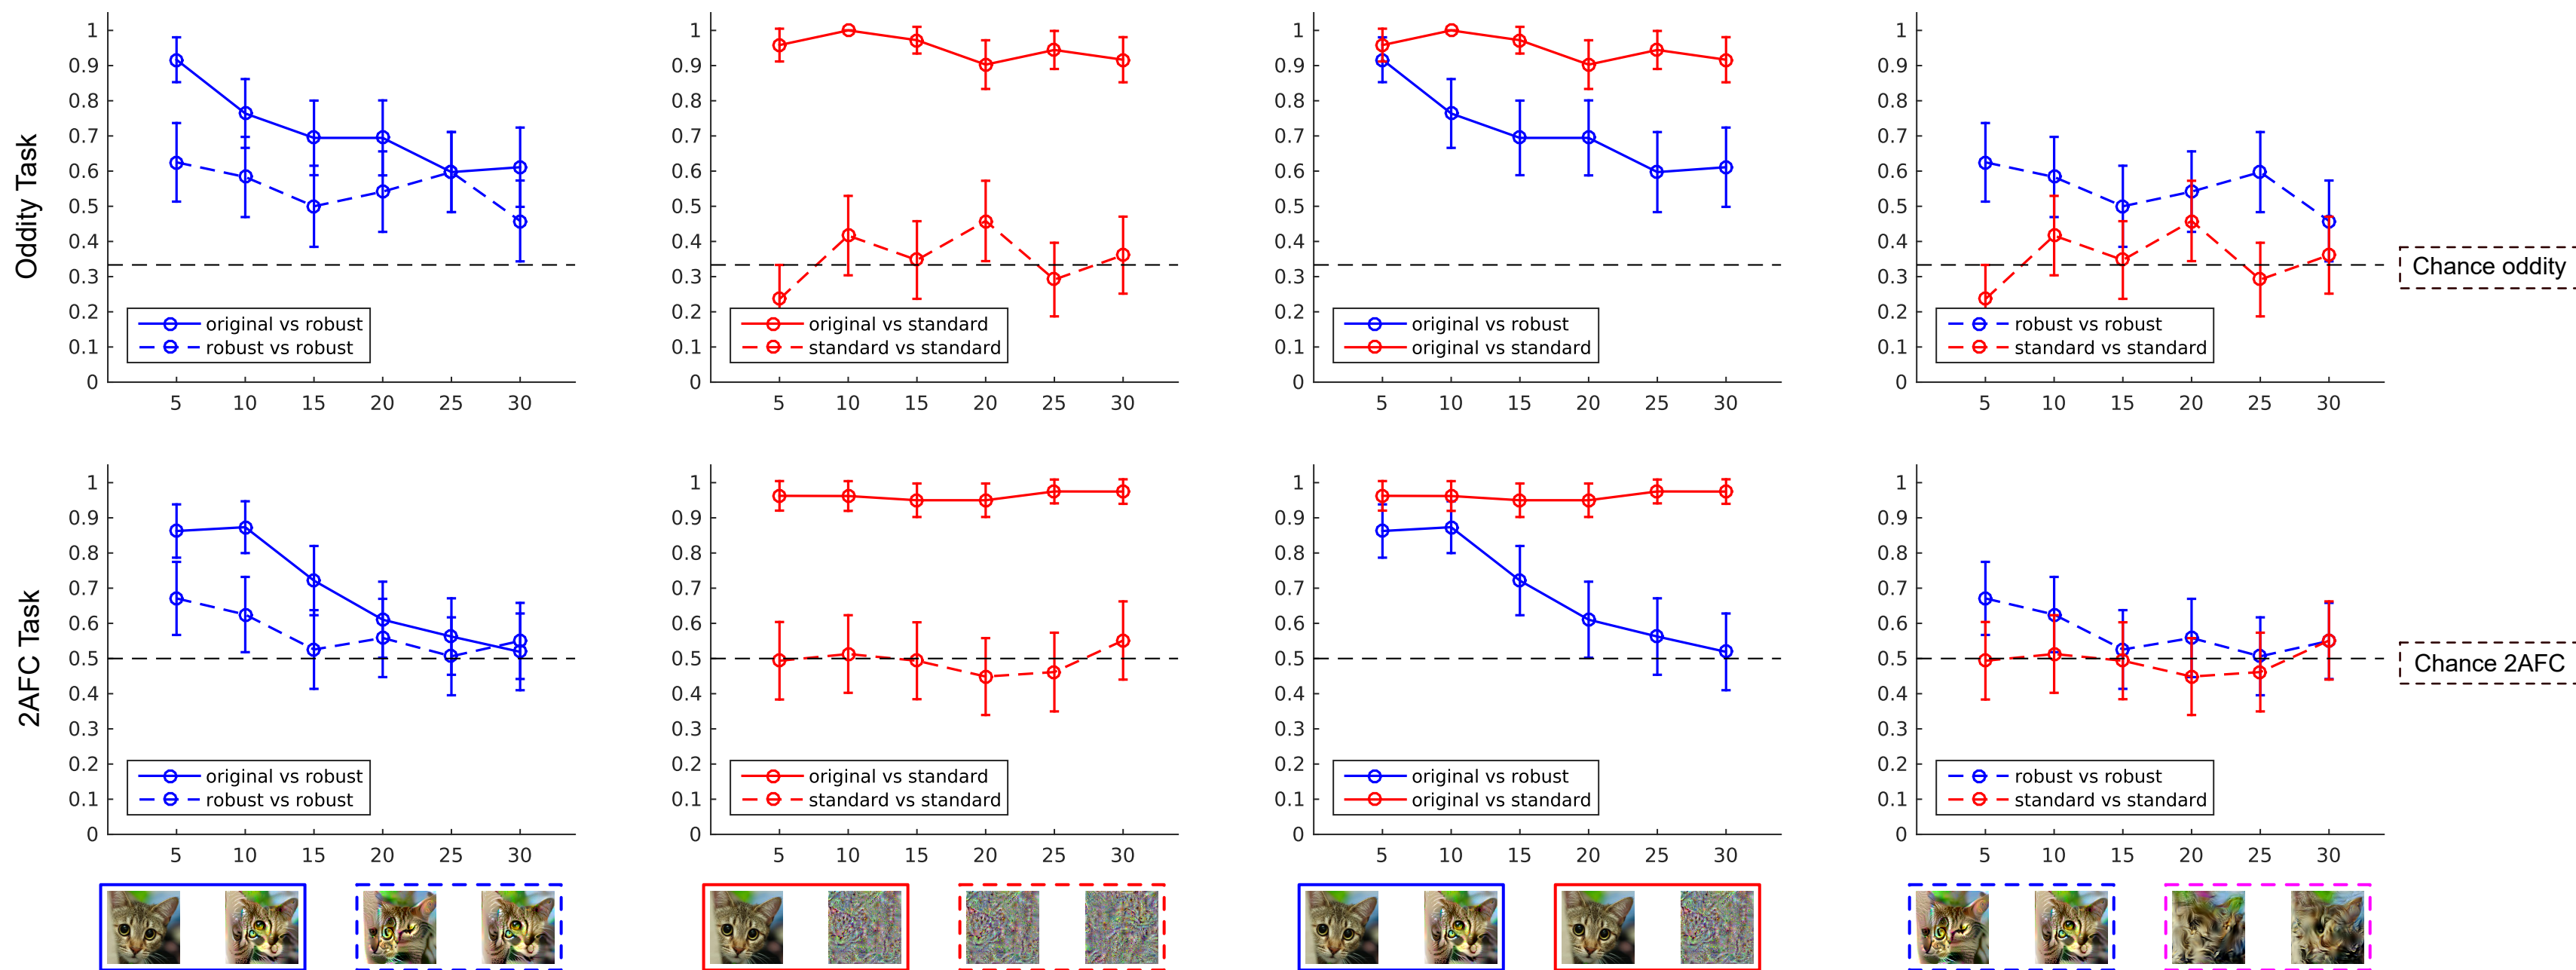

Robust vs Texform

Proportion Correct

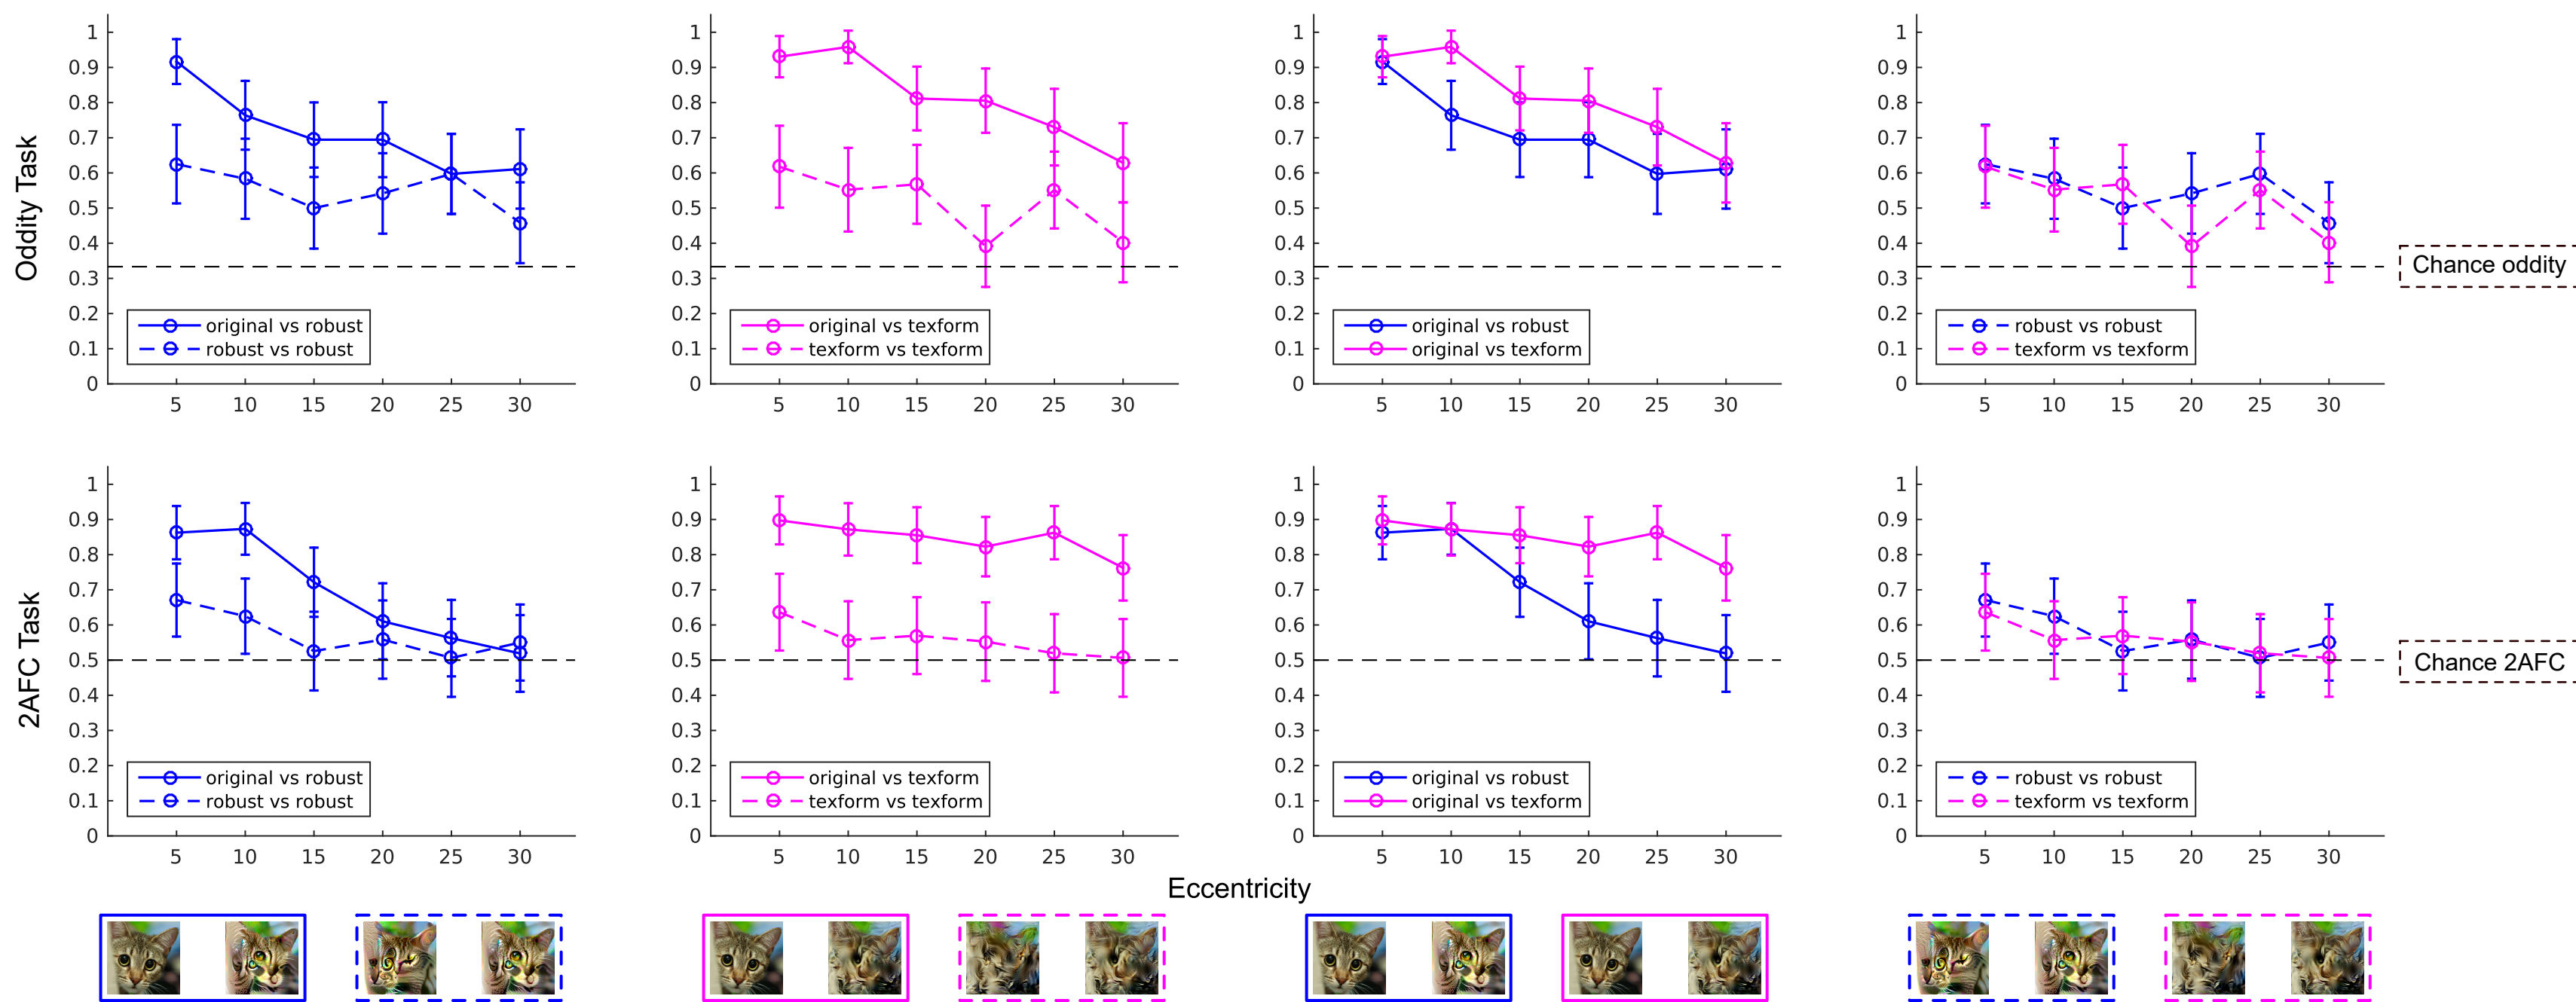

Supplement: supplementary_material [file attachment]

subject 32

## Robust vs Standard

Proportion Correct

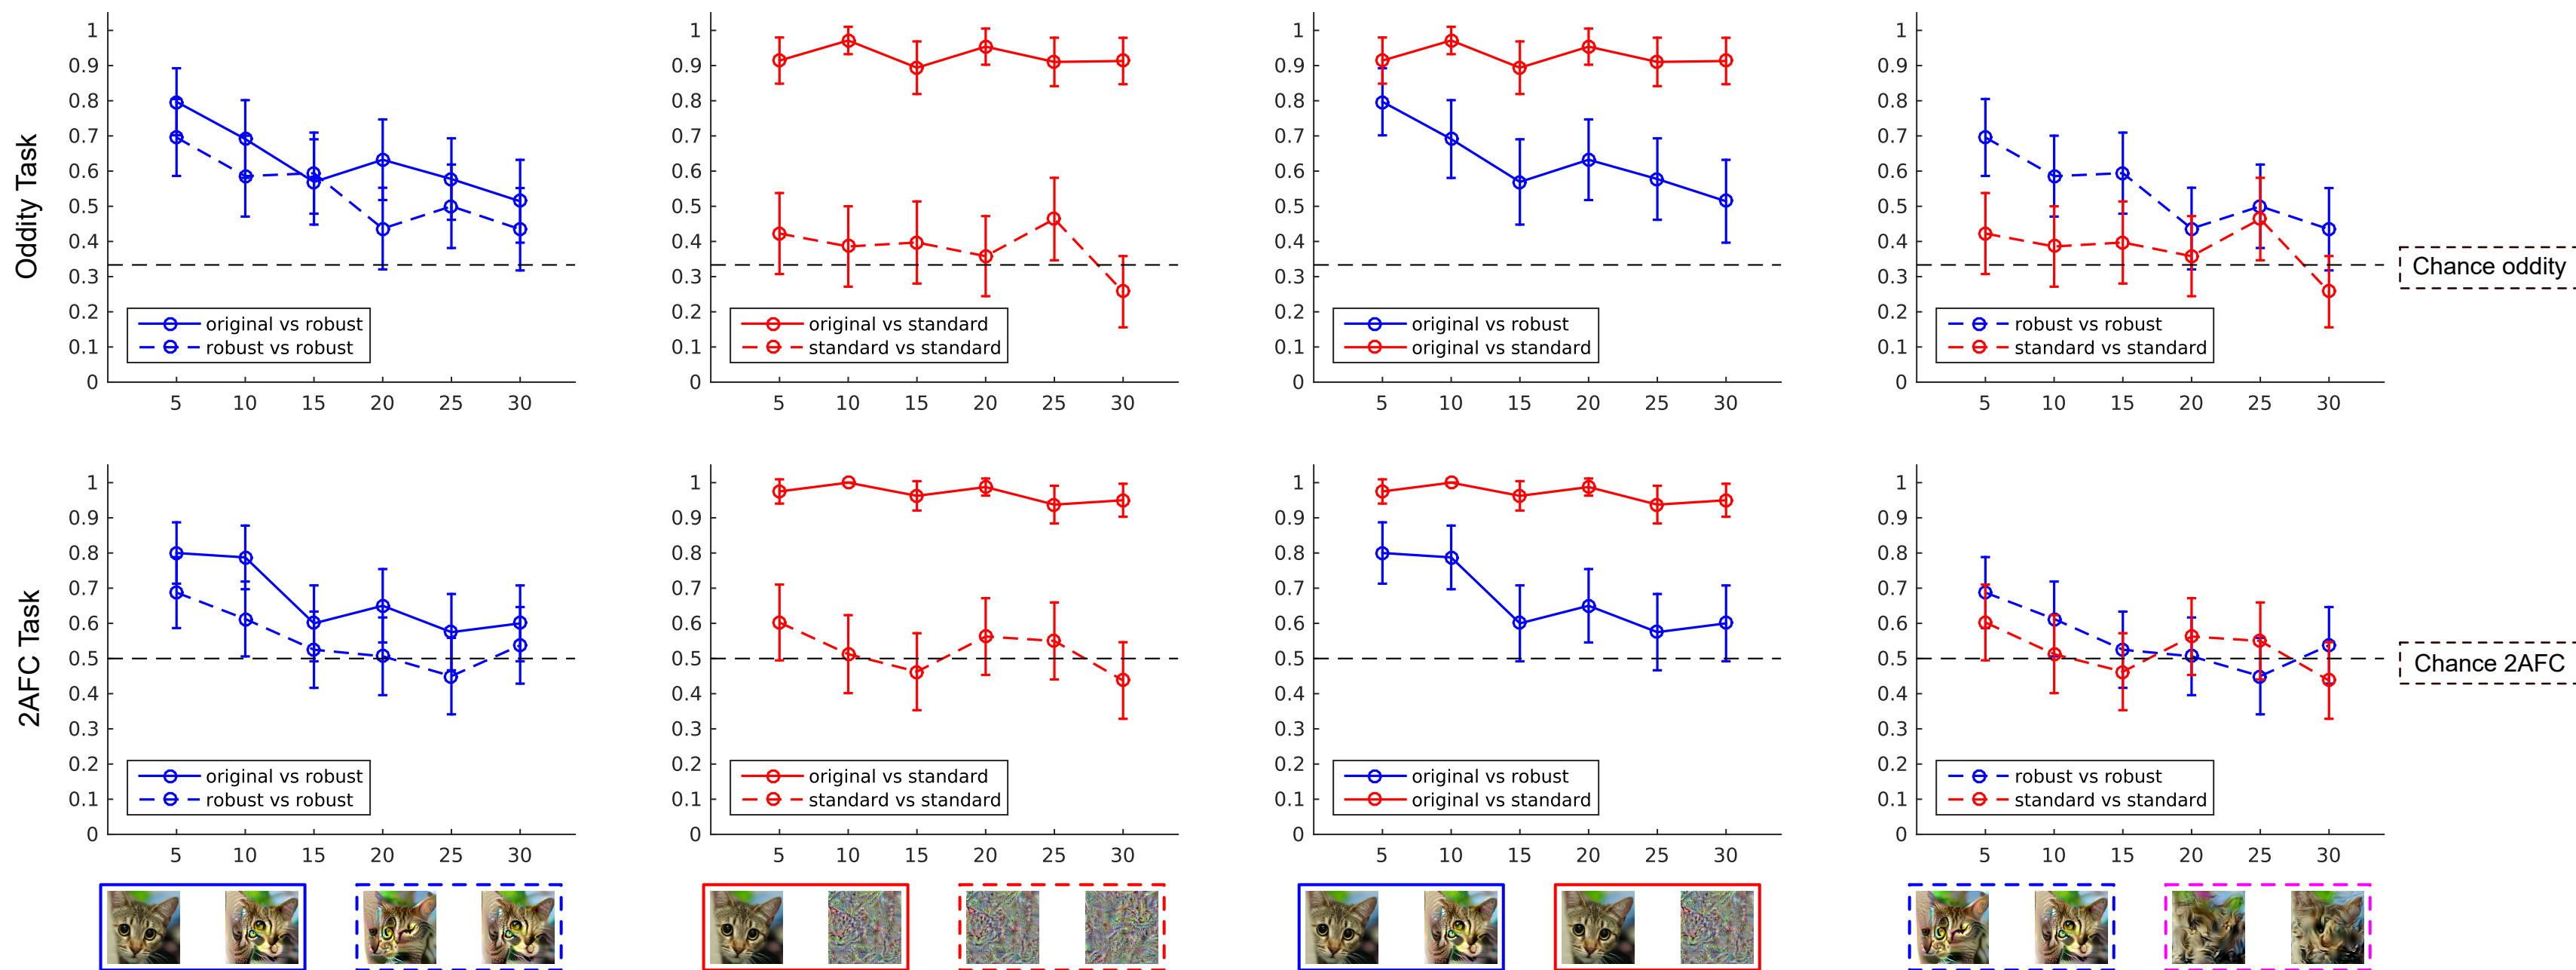

## Robust vs Texform

Proportion Correct

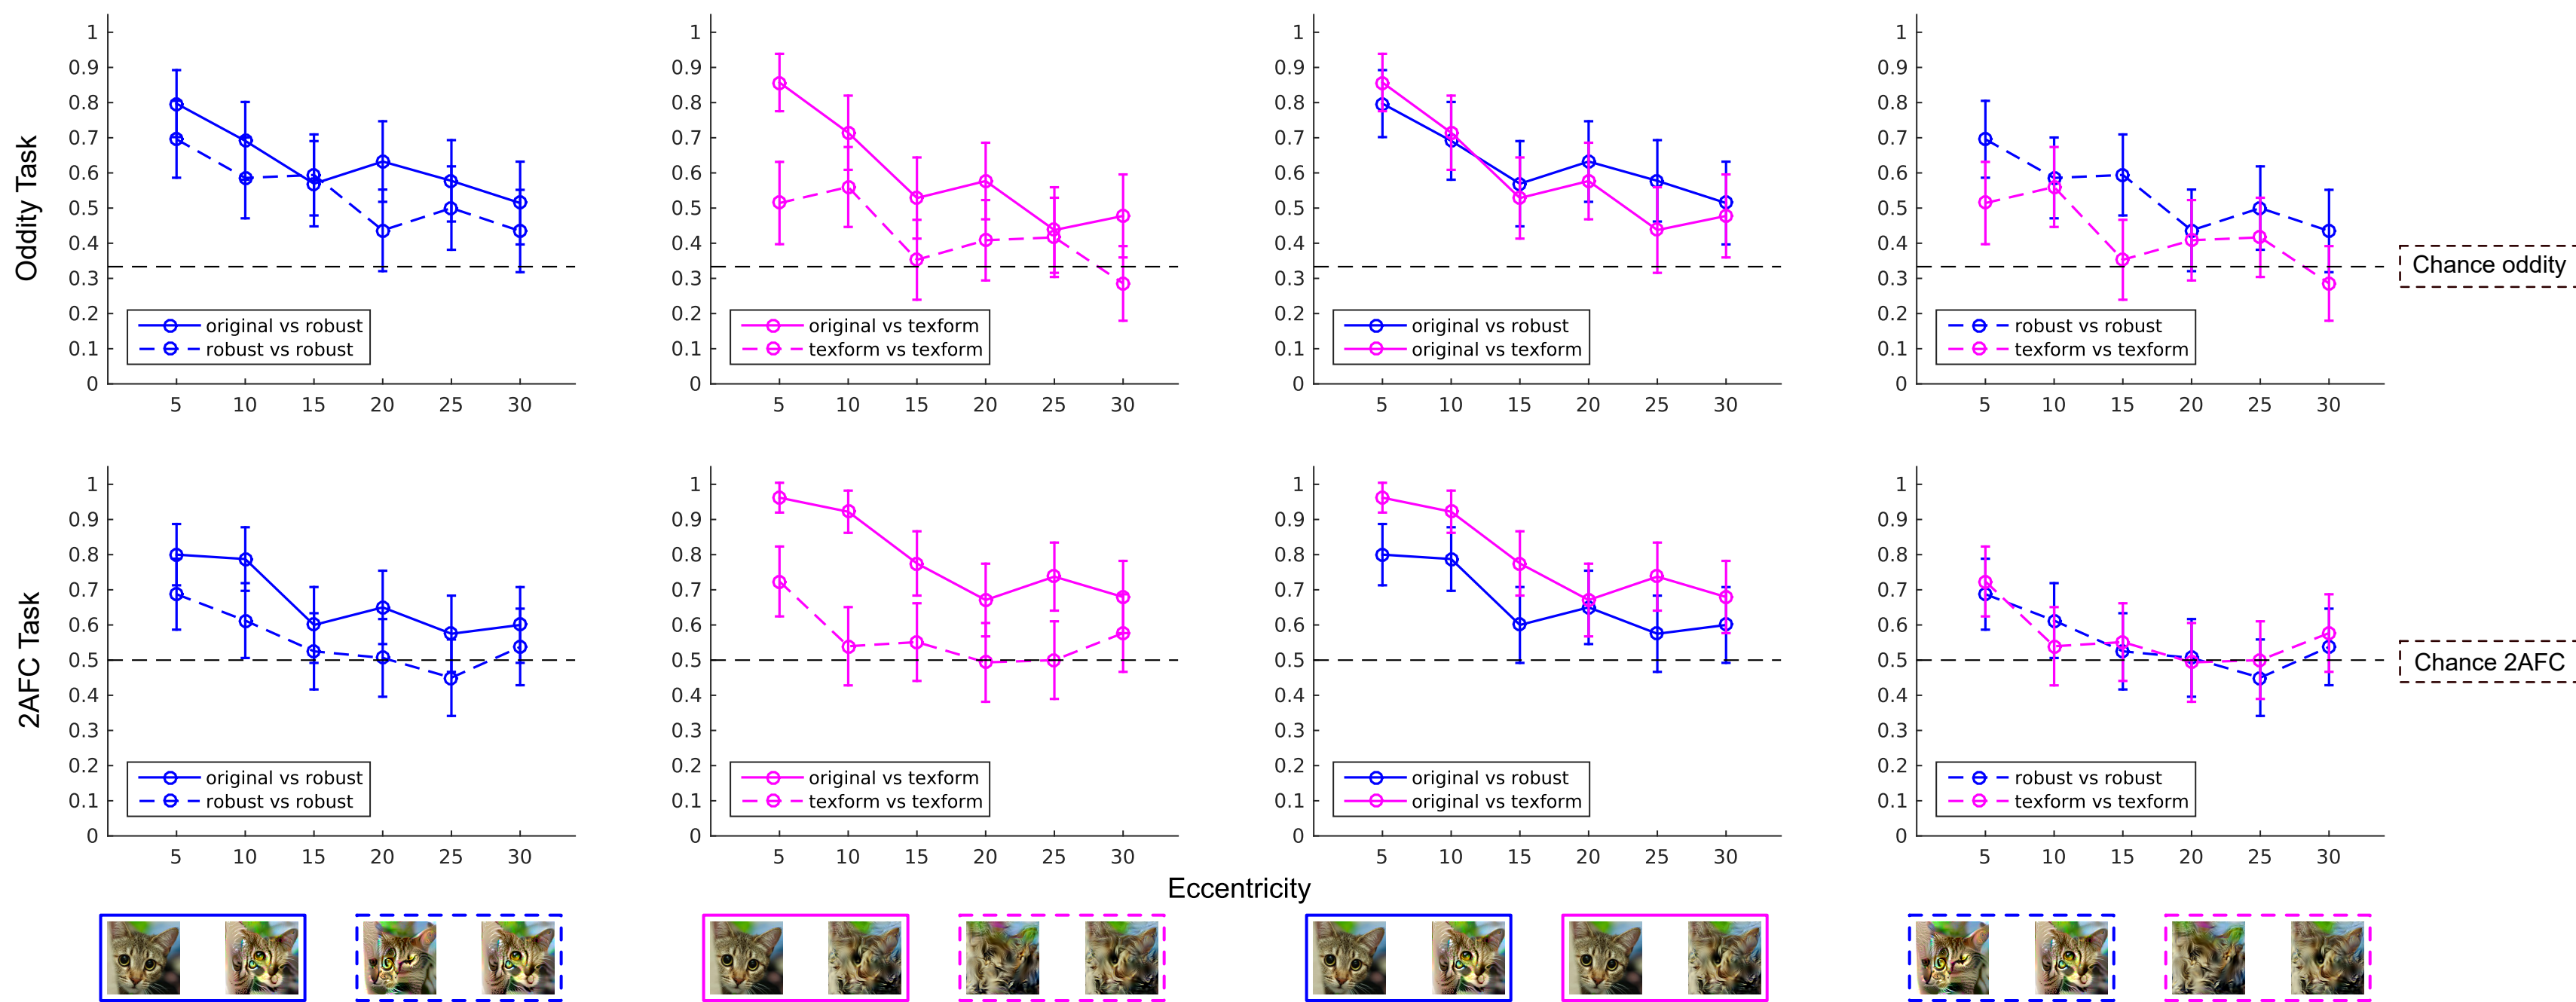

Supplement: supplementary_material [file attachment]

subject 34

## Robust vs Standard

Proportion Correct

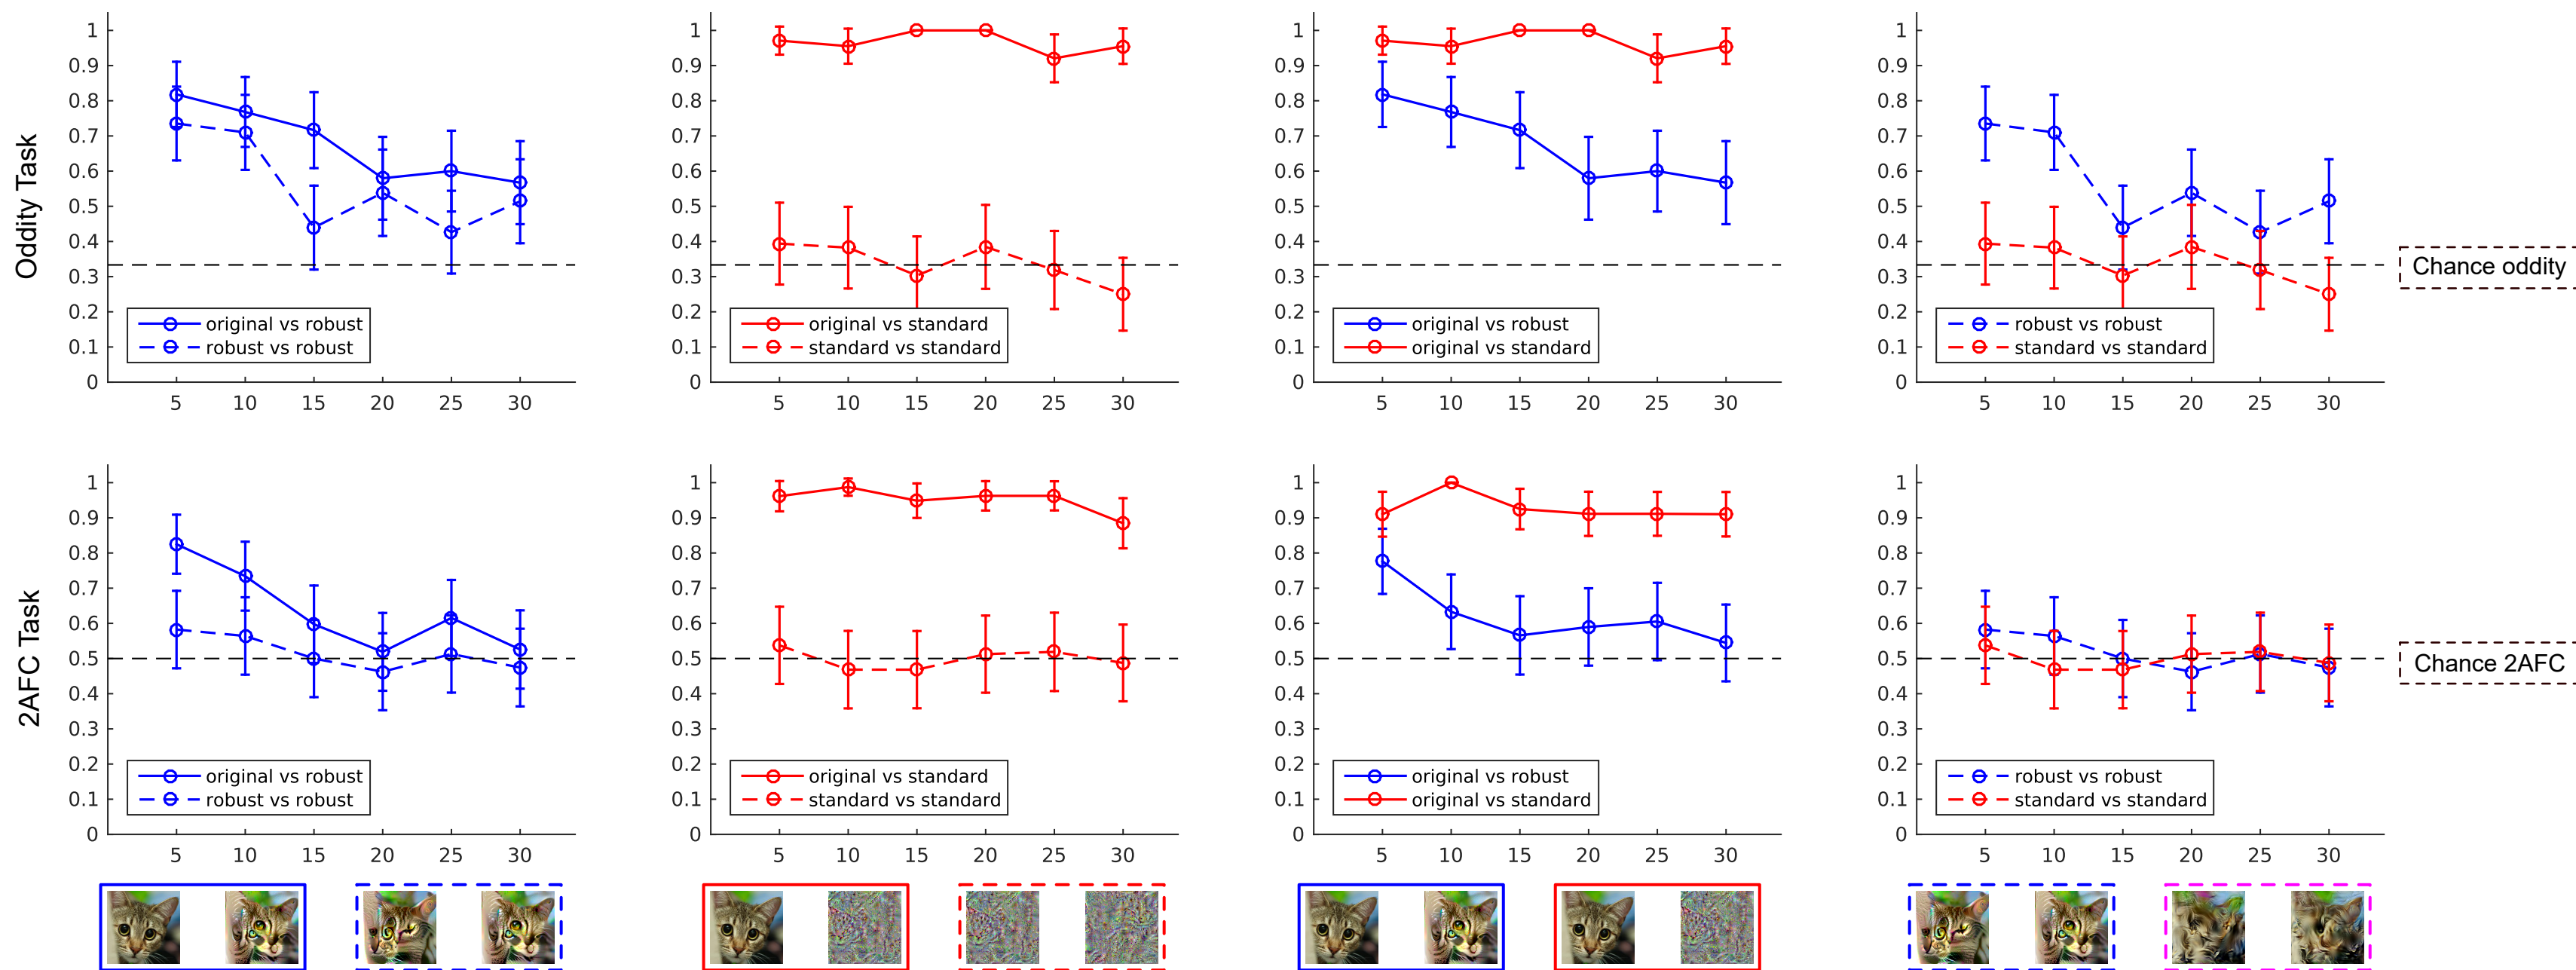

## Robust vs Texform

Proportion Correct

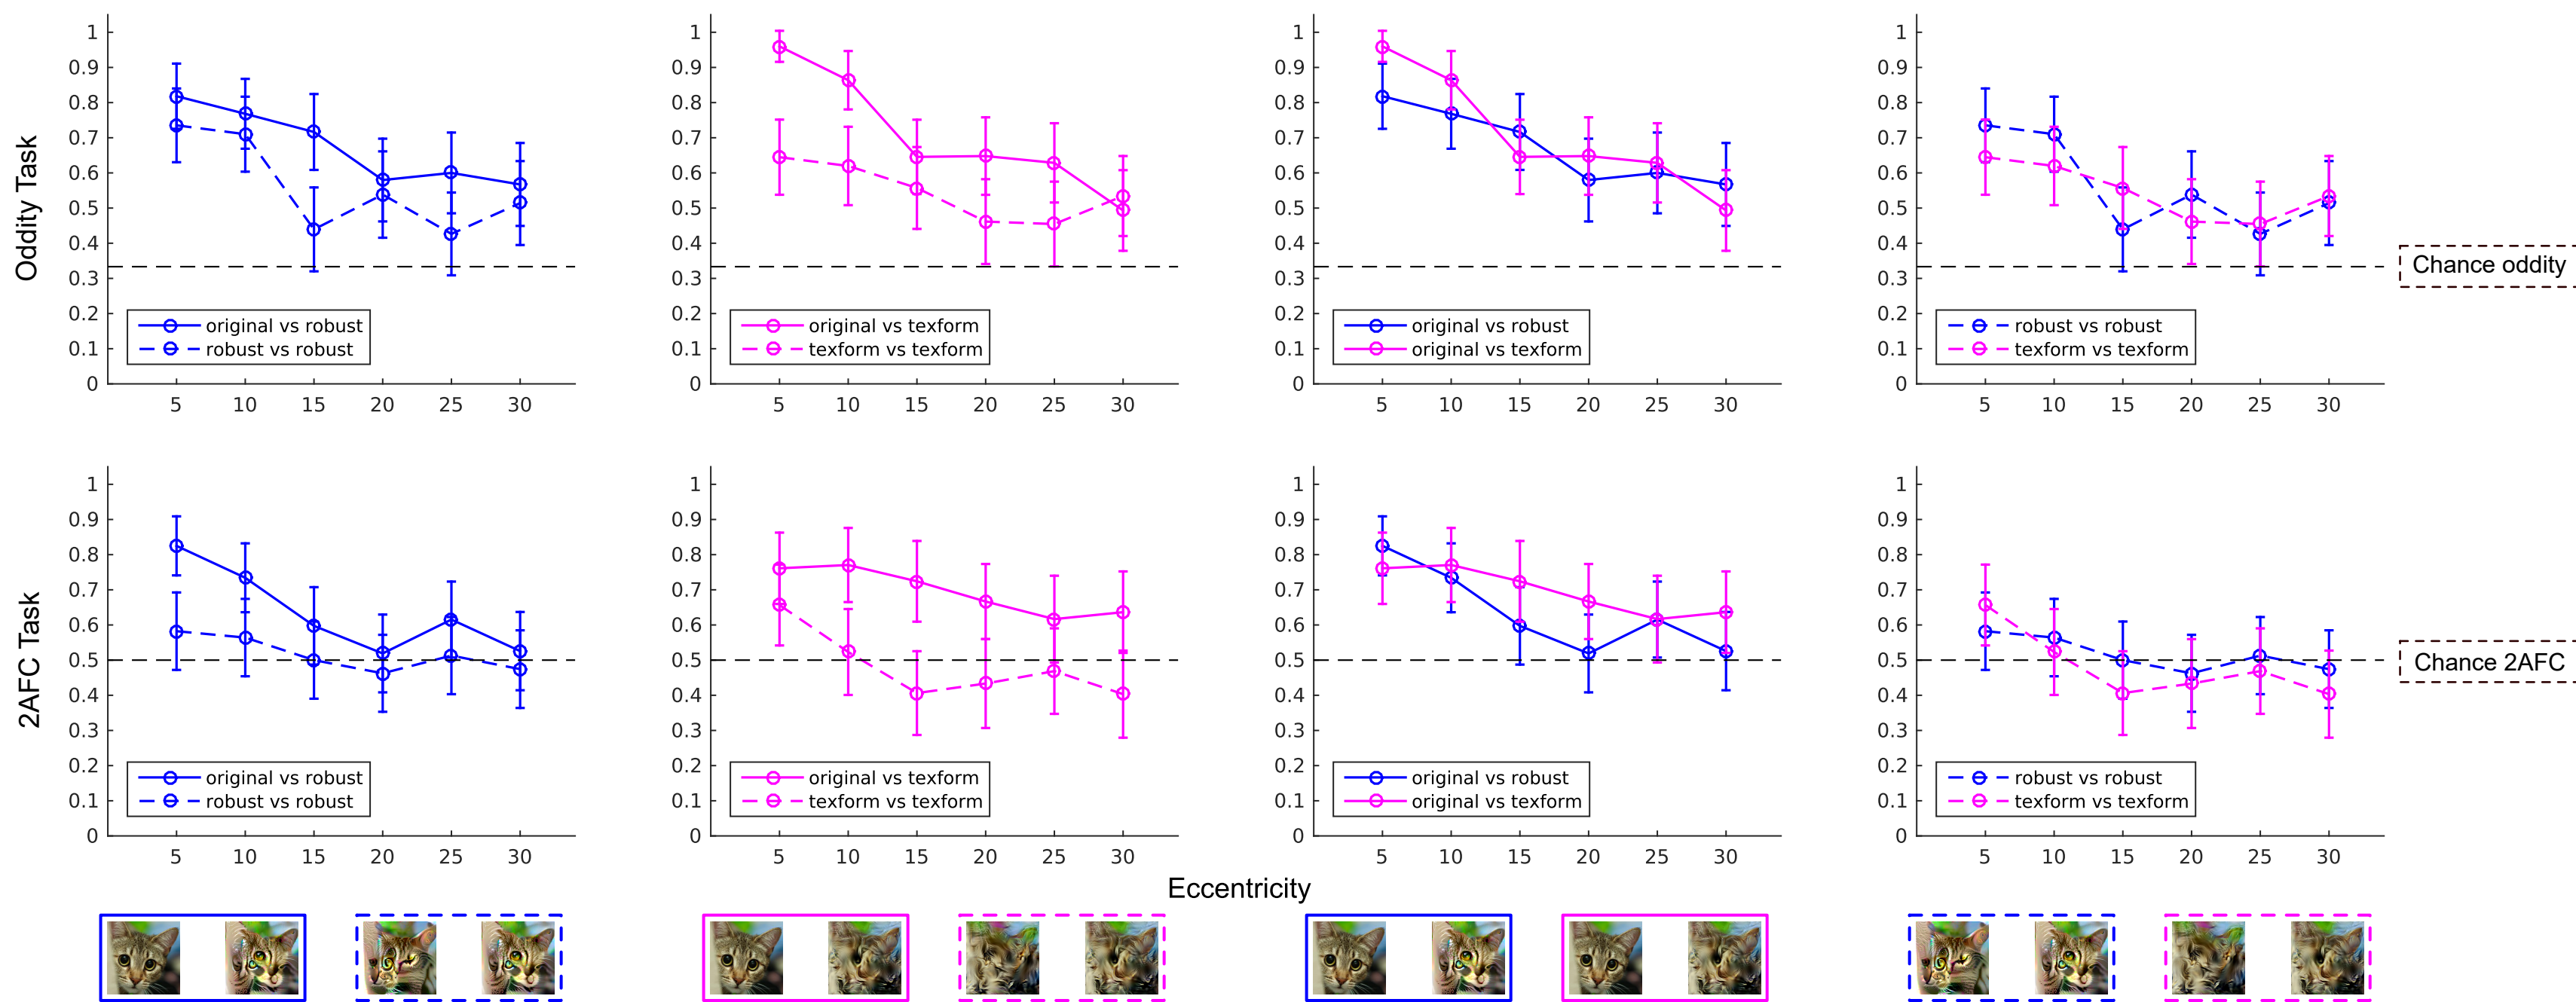

Supplement: supplementary_material [file attachment]

subject 89

## Robust vs Standard

Proportion Correct

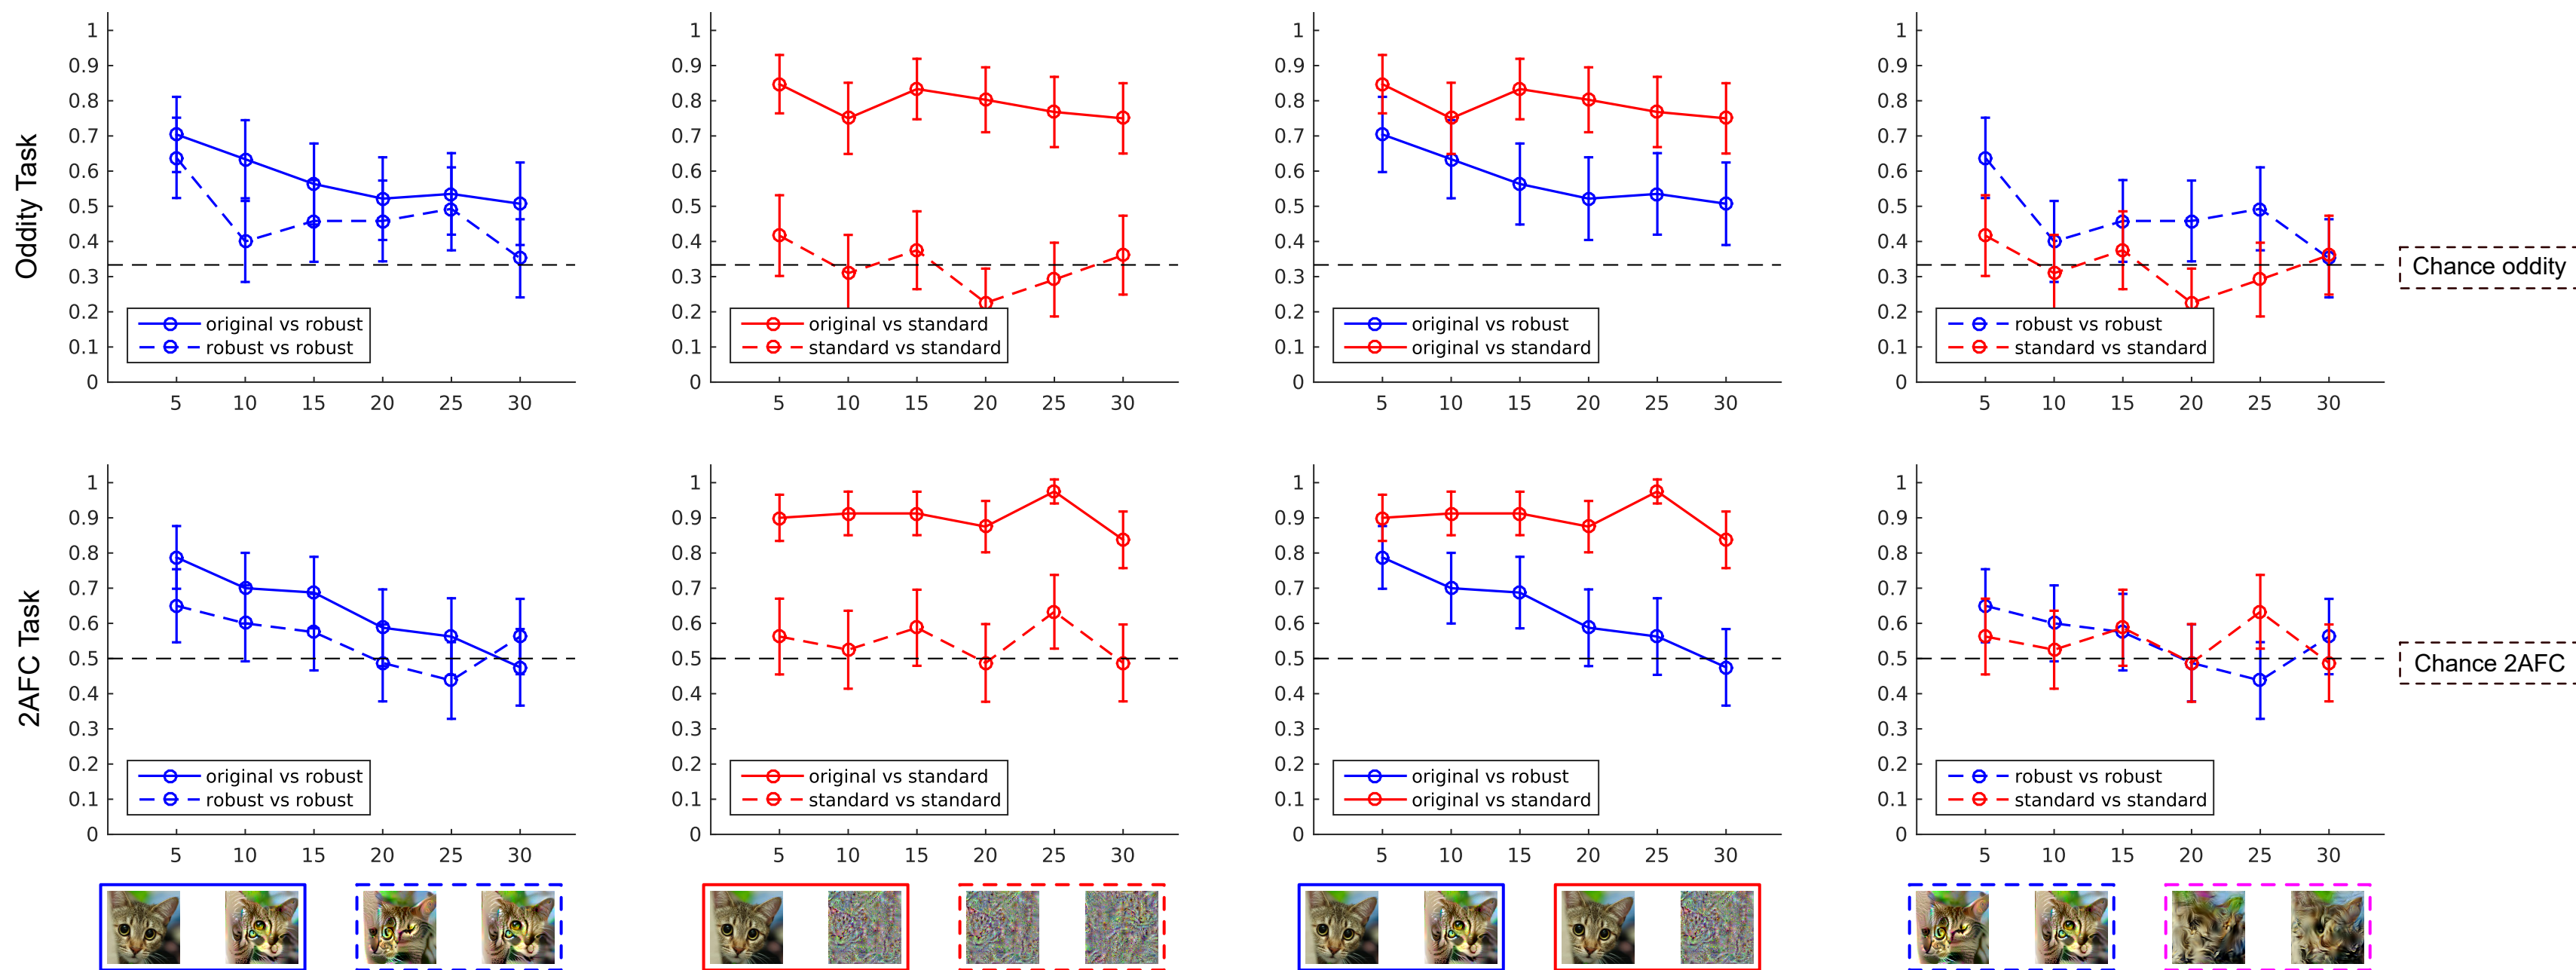

## Robust vs Texform

Proportion Correct

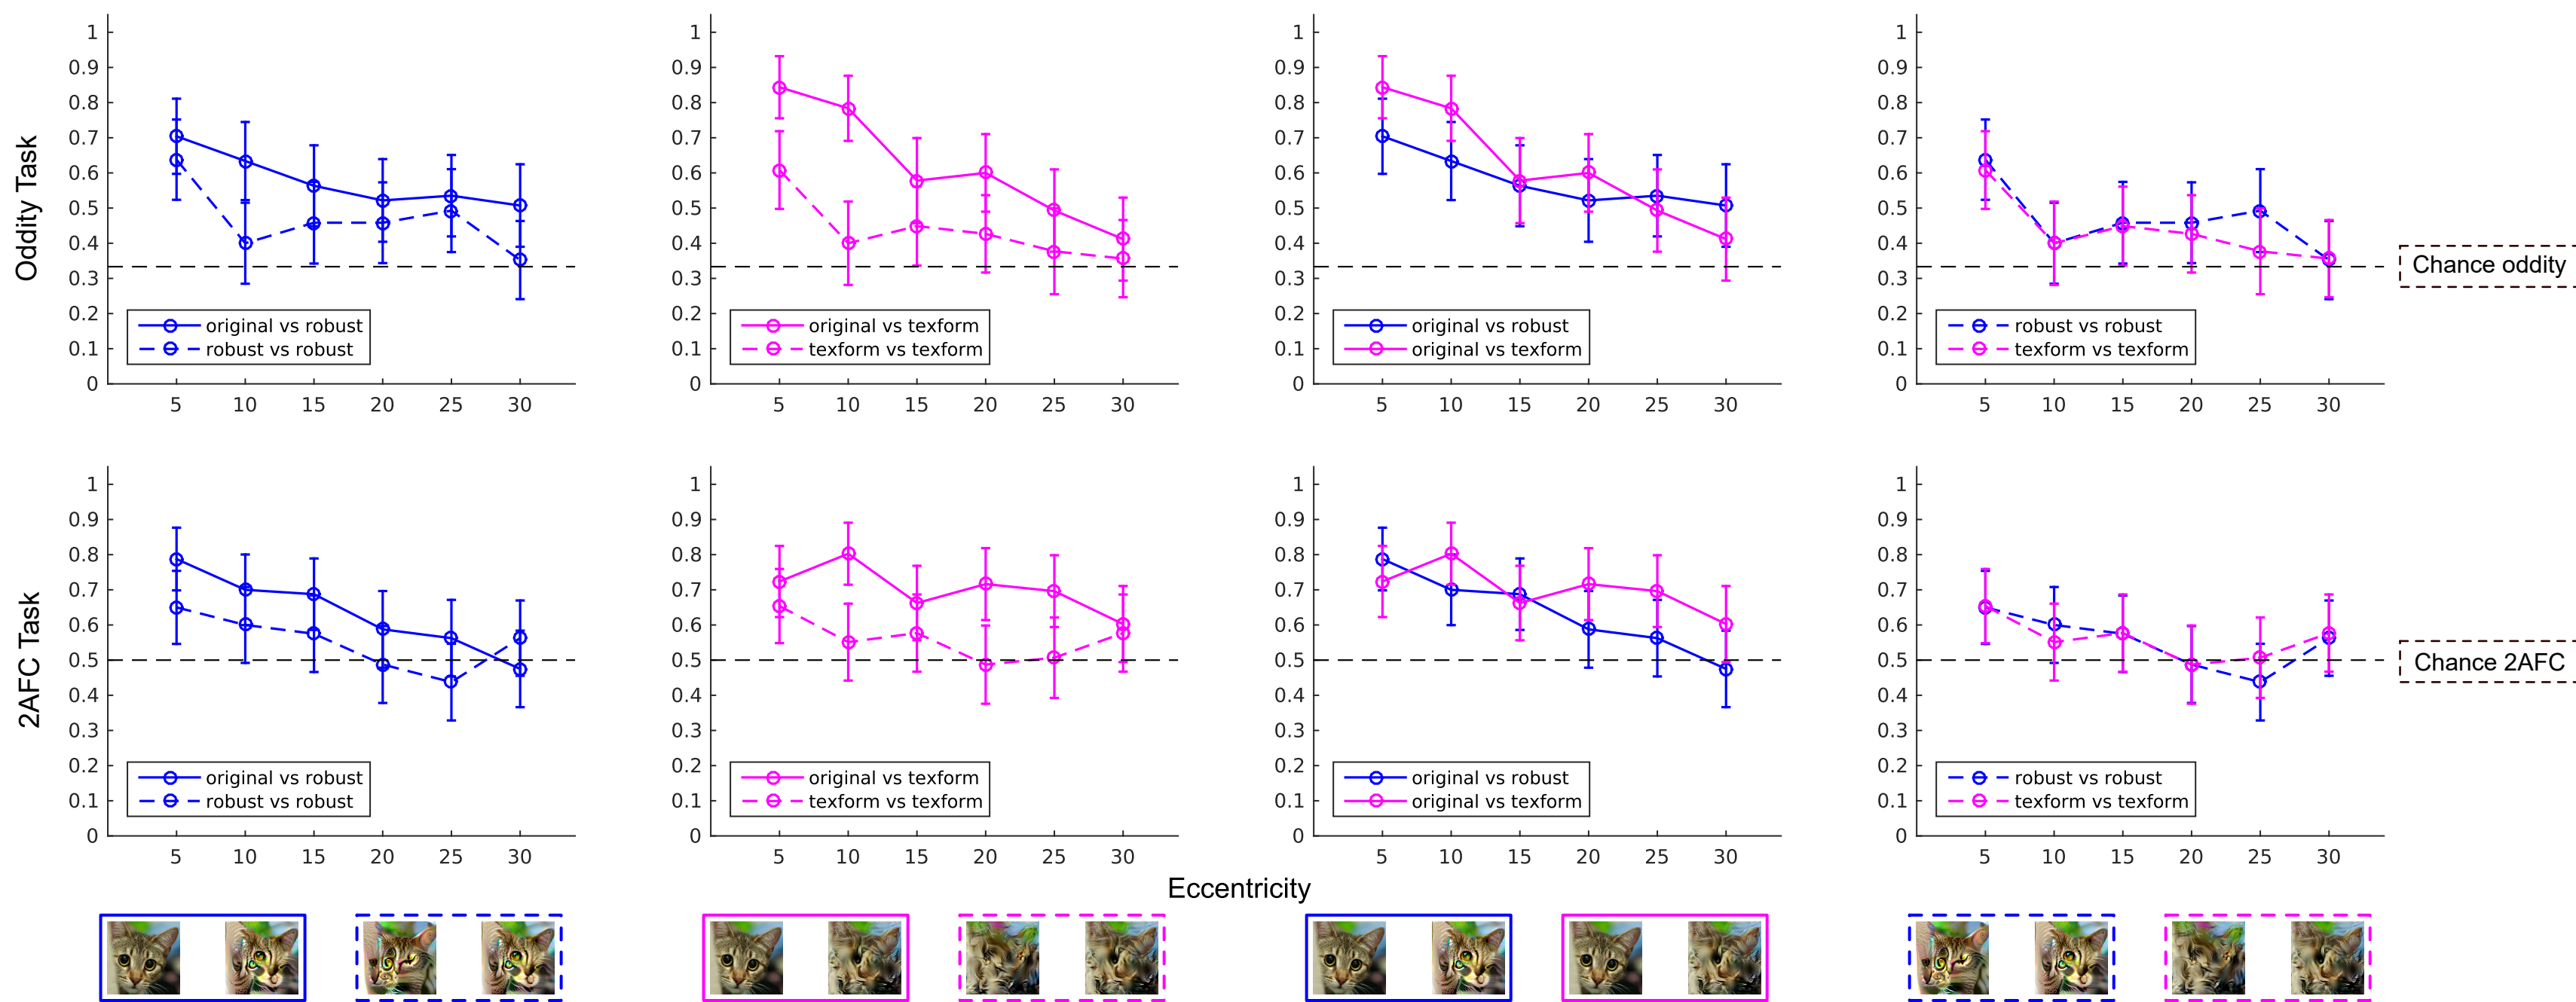

Supplement: supplementary_material [file attachment]

subject 11

## Robust vs Standard

Proportion Correct

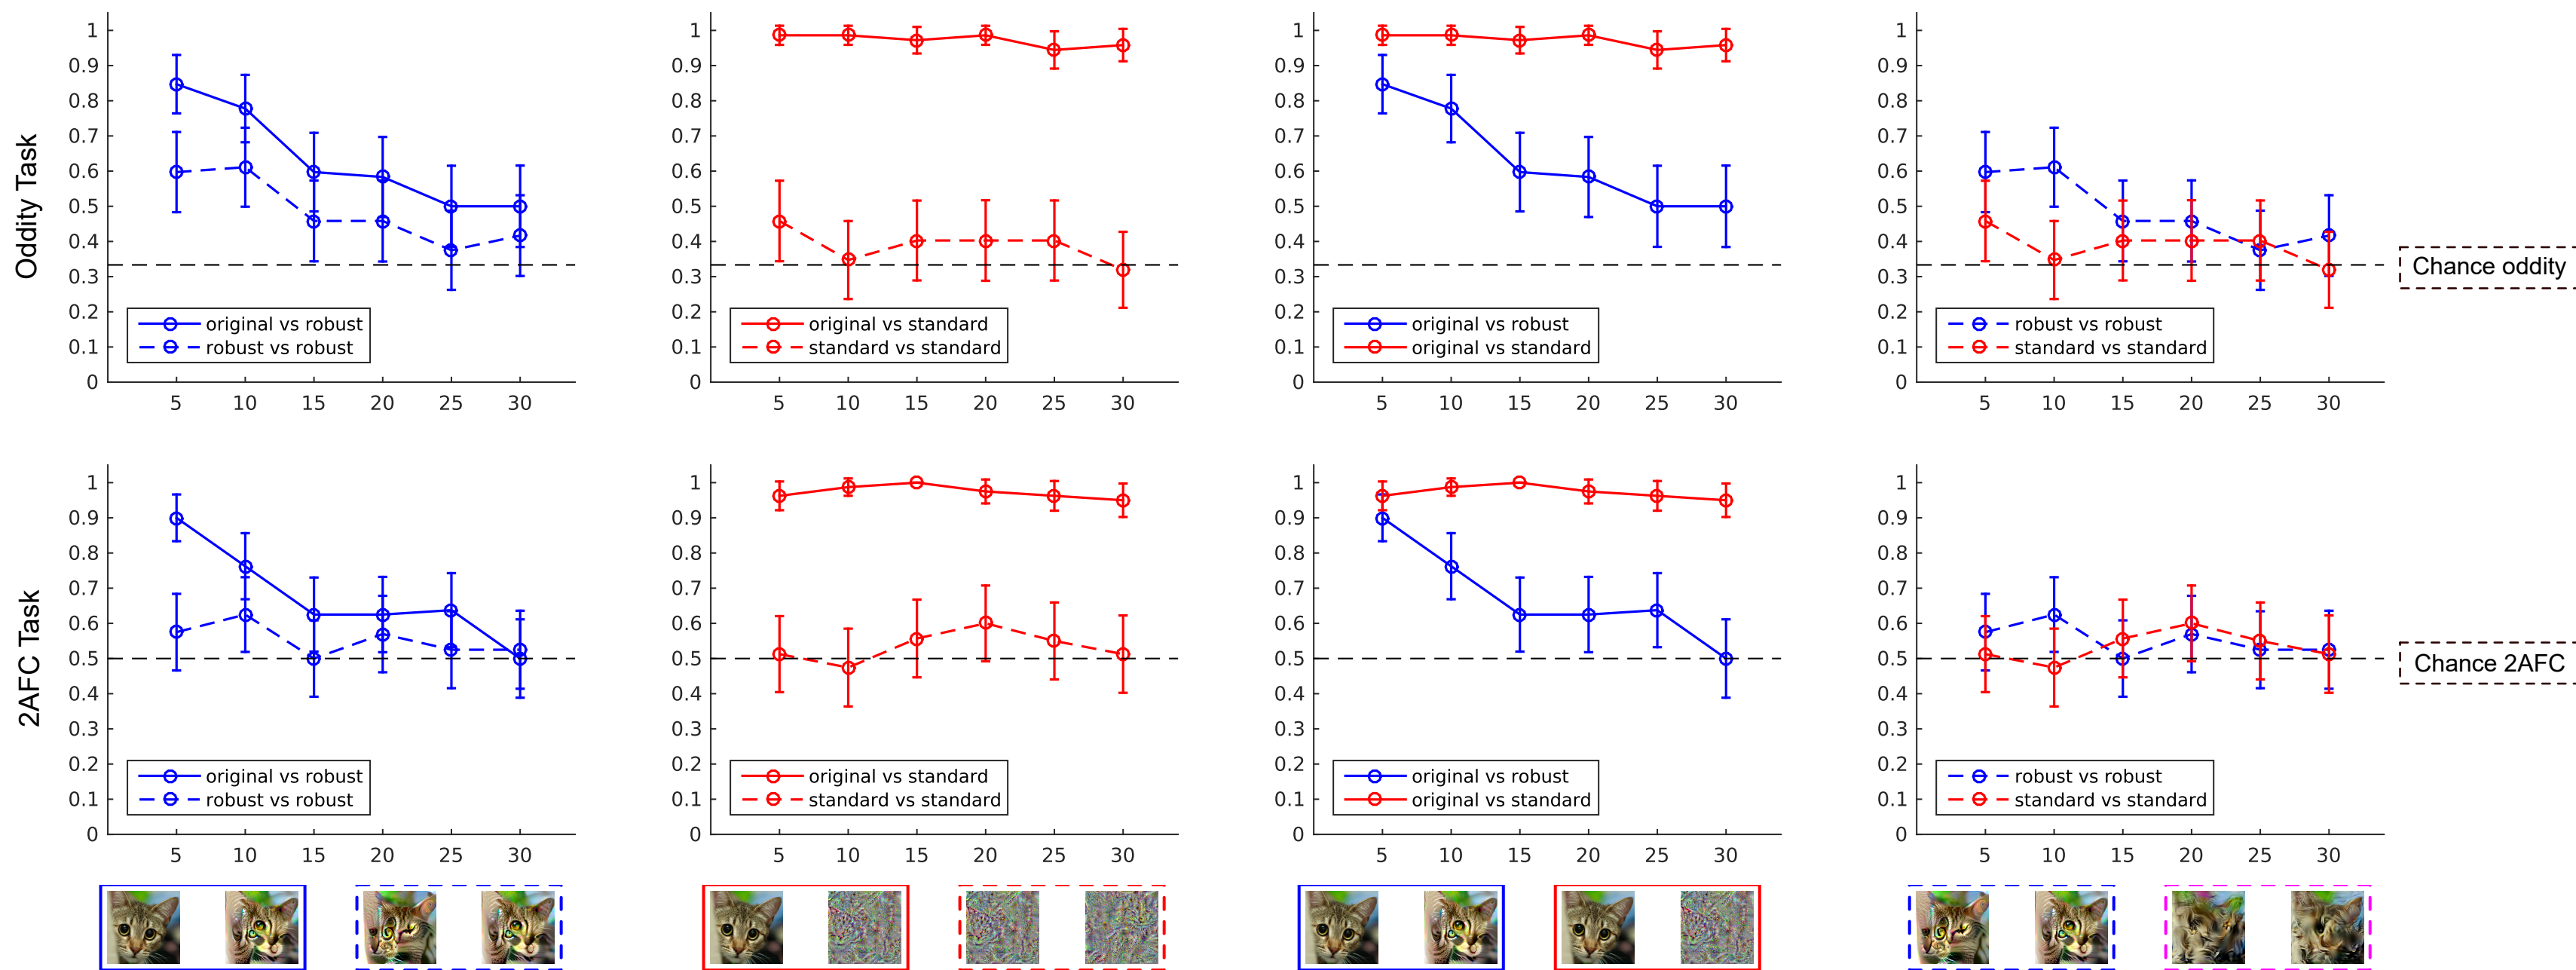

## Robust vs Texform

Proportion Correct

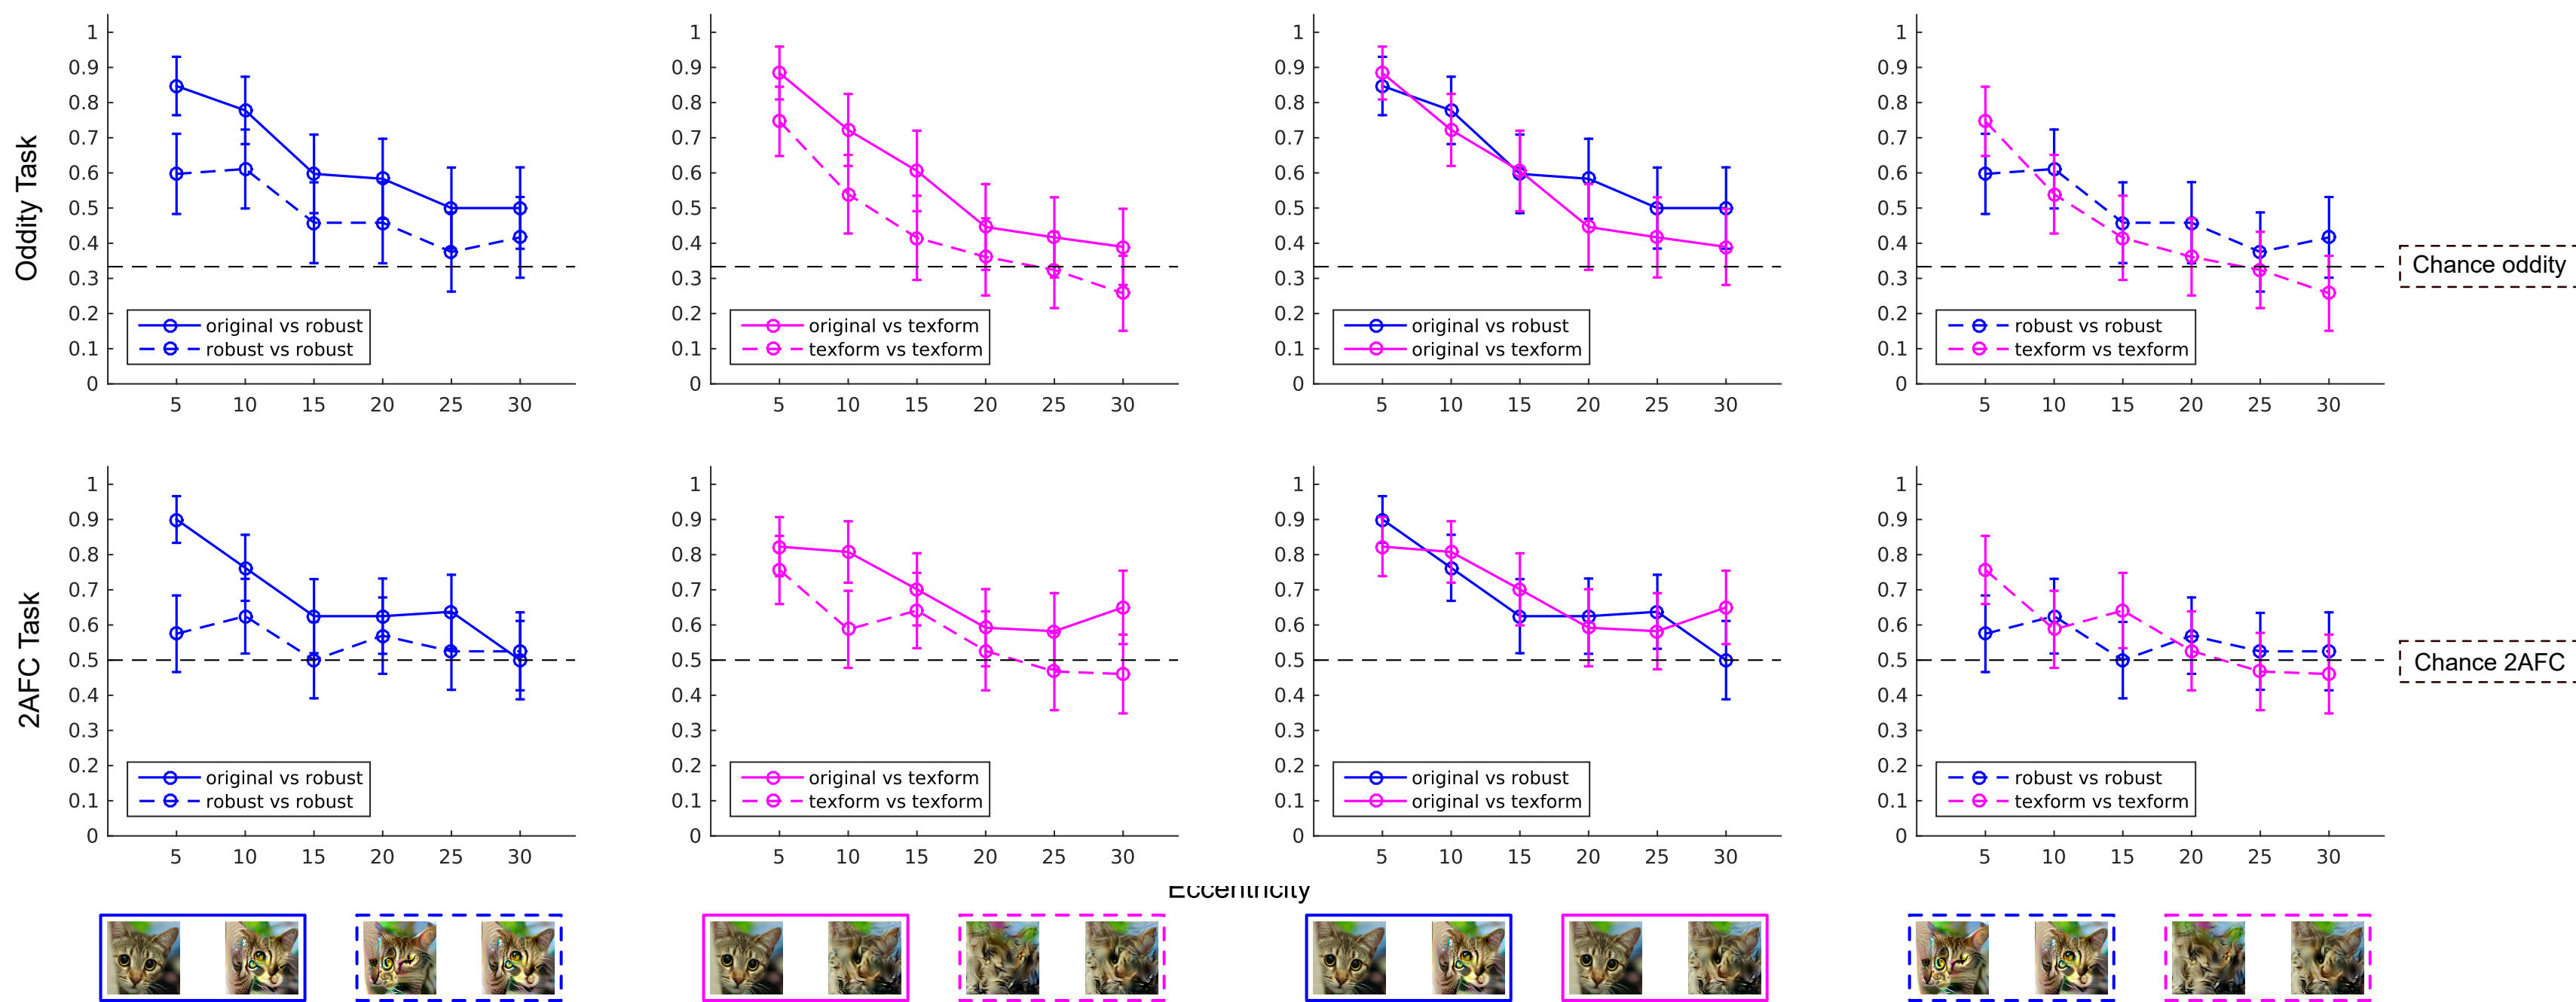

Supplement: supplementary_material [file attachment]
